# Supplementary material for: Synthesis and Antiproliferative Evaluation of Novel Hybrids of Dehydroabietic Acid Bearing 1,2,3-Triazole Moiety
Source: PubMed Central journal article supplement (PMC6891475; doi:10.3390/molecules24224191), 2019-11-19
Supplement: molecules-24-04191-s001.pdf [file molecules-24-04191-s001.pdf]

Synthesis and antiproliferative evaluation of novel hybrids of dehydroabietic acid bearing 1,2,3-triazole moiety

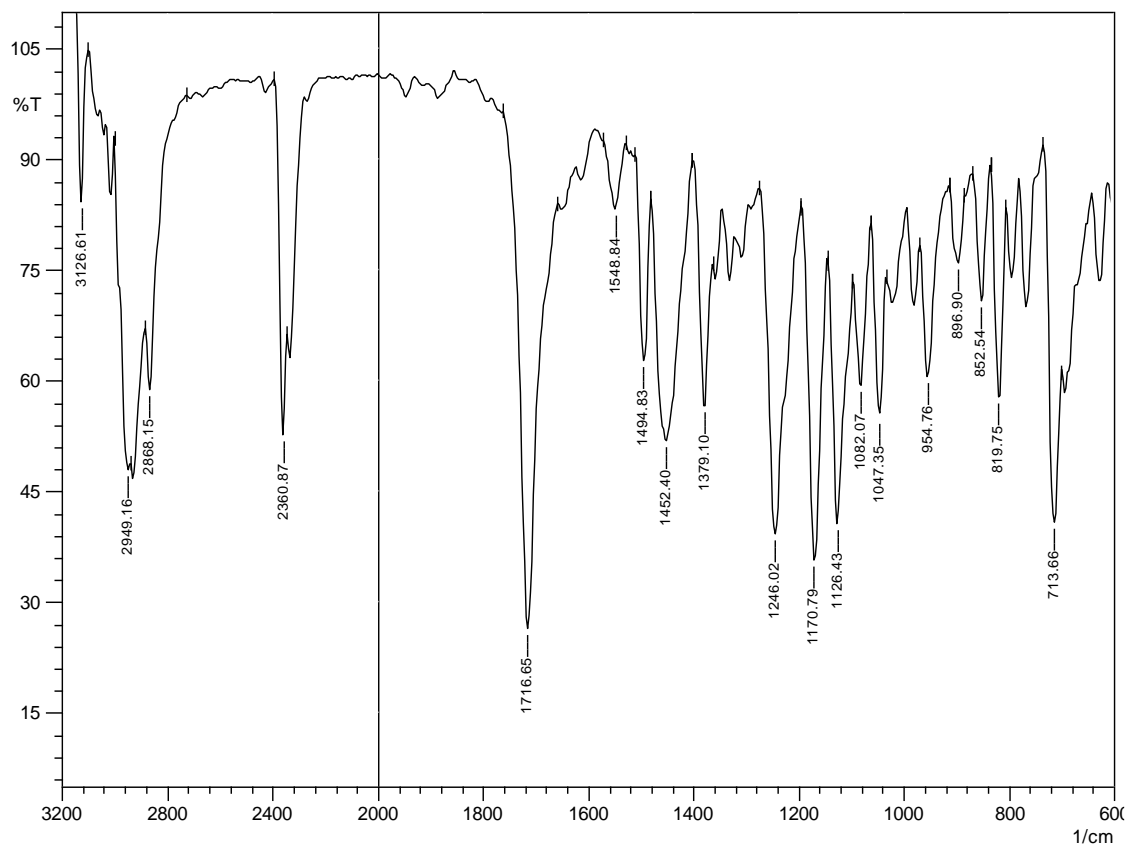

Figure S1. FTIR spectrum of 3a

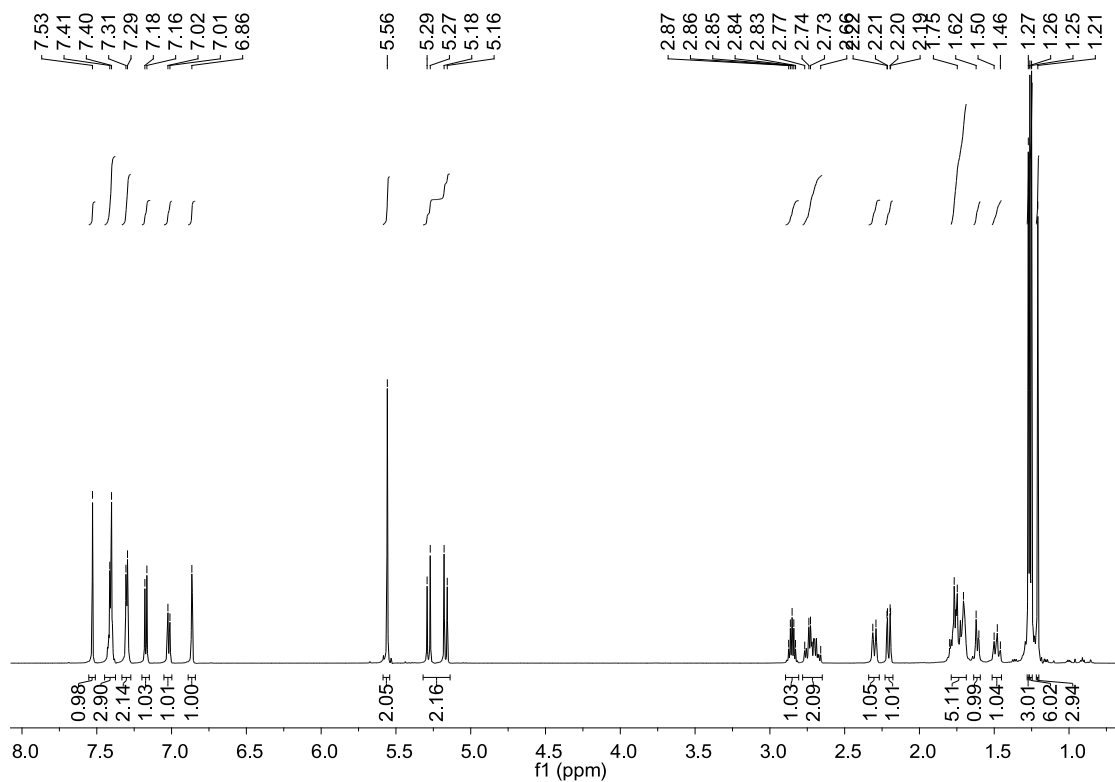

Figure S2. <sup>1</sup>H-NMR spectrum of 3a

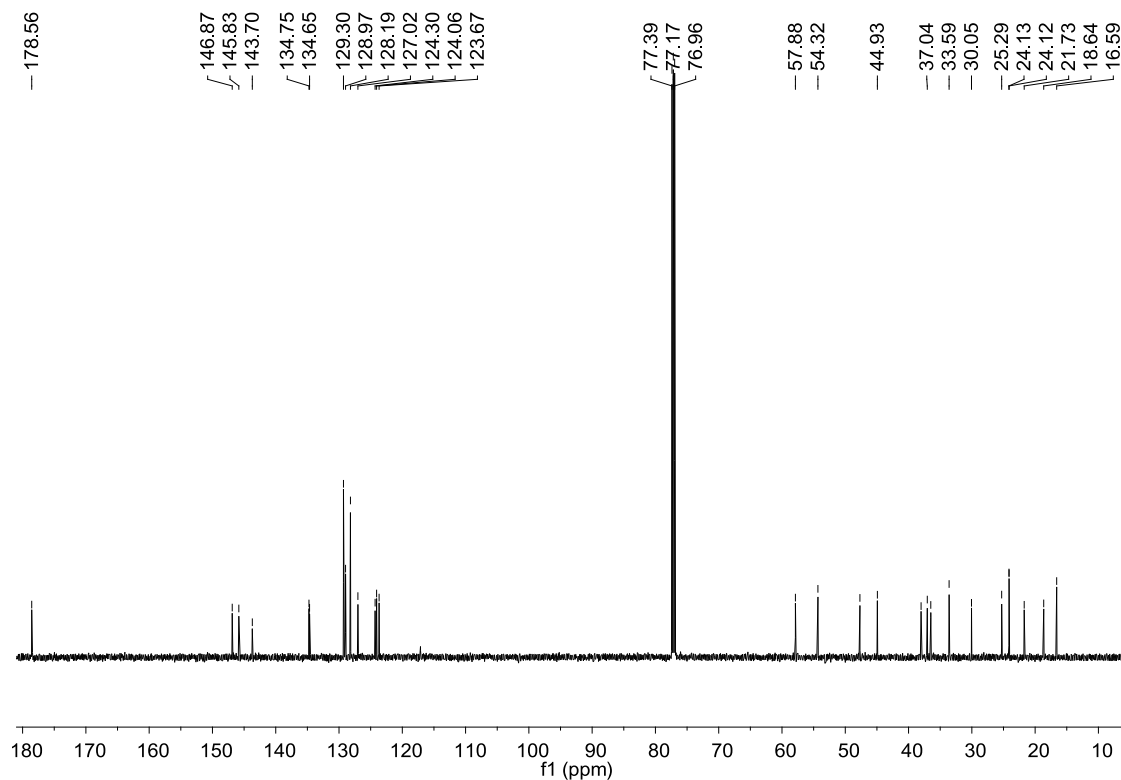

**Figure S3.**  $^{13}\text{C-NMR}$  spectrum of **3a**

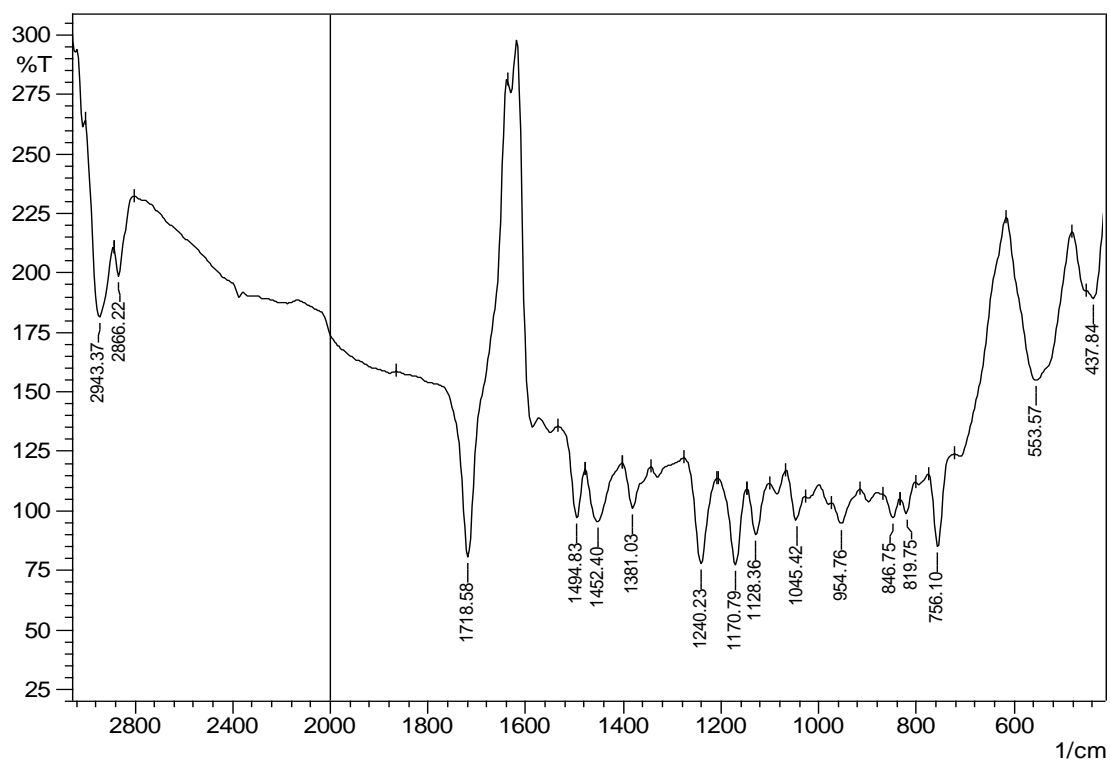

**Figure S4.** FTIR spectrum of **3b**

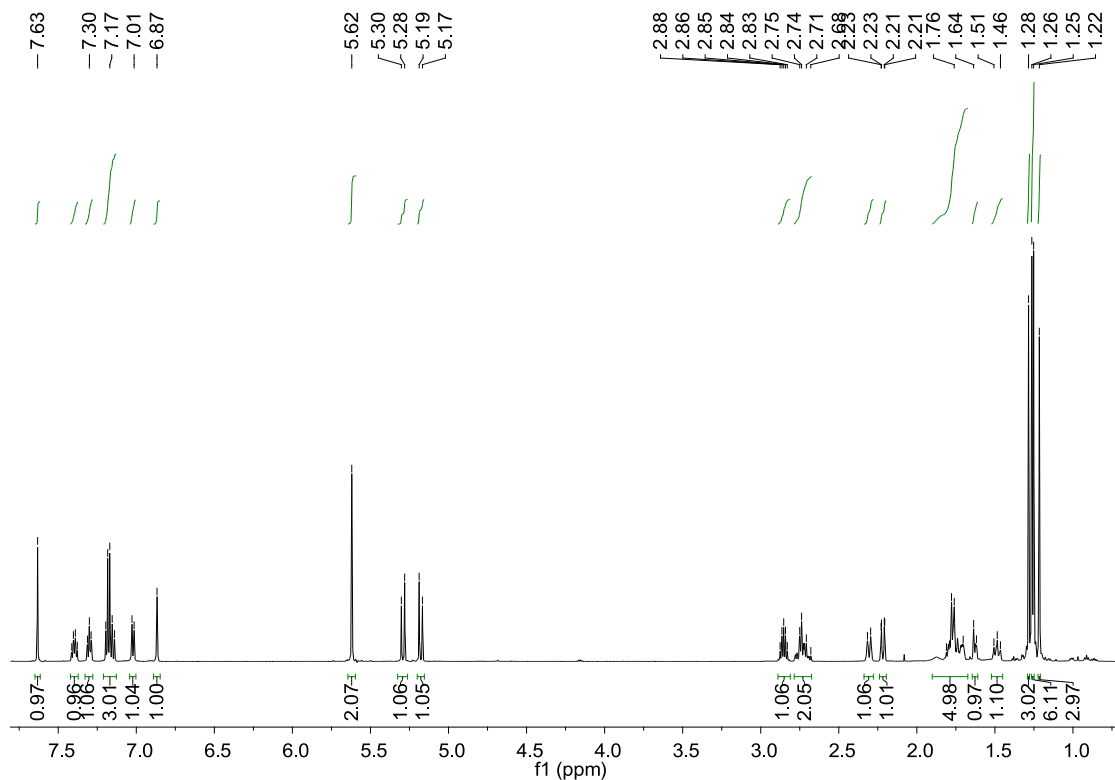

**Figure S5. <sup>1</sup>H-NMR spectrum of 3b**

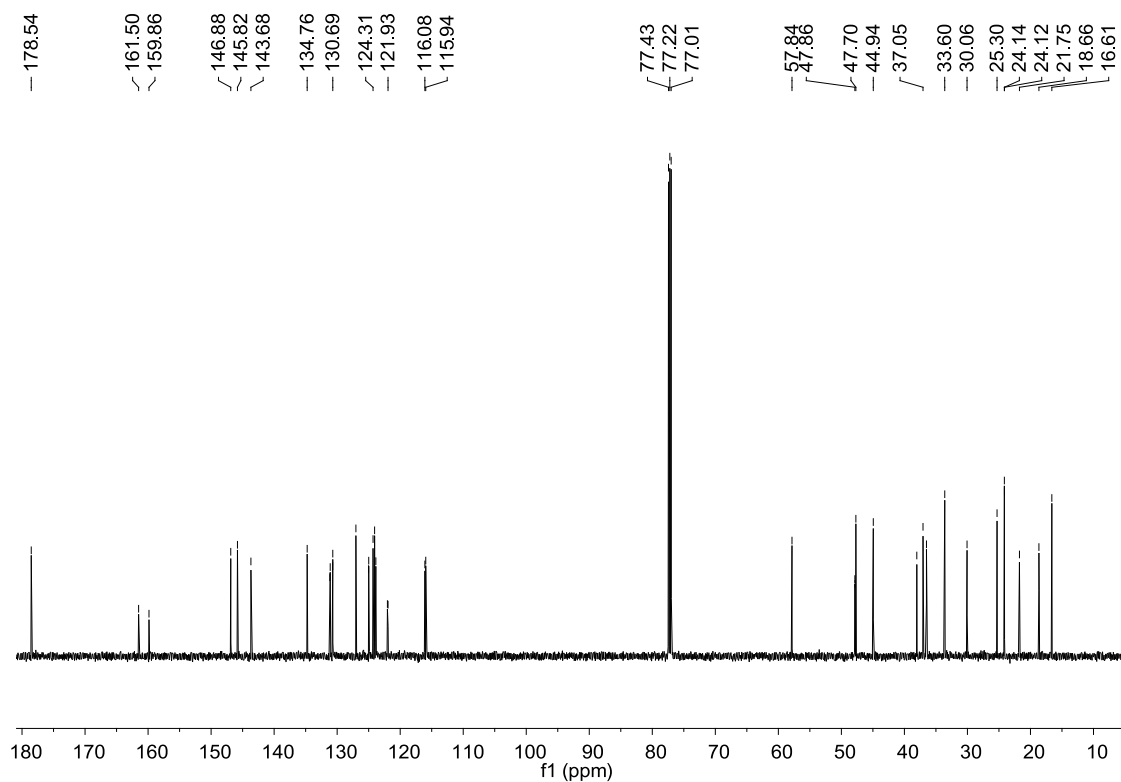

**Figure S6. <sup>13</sup>C-NMR spectrum of 3b**

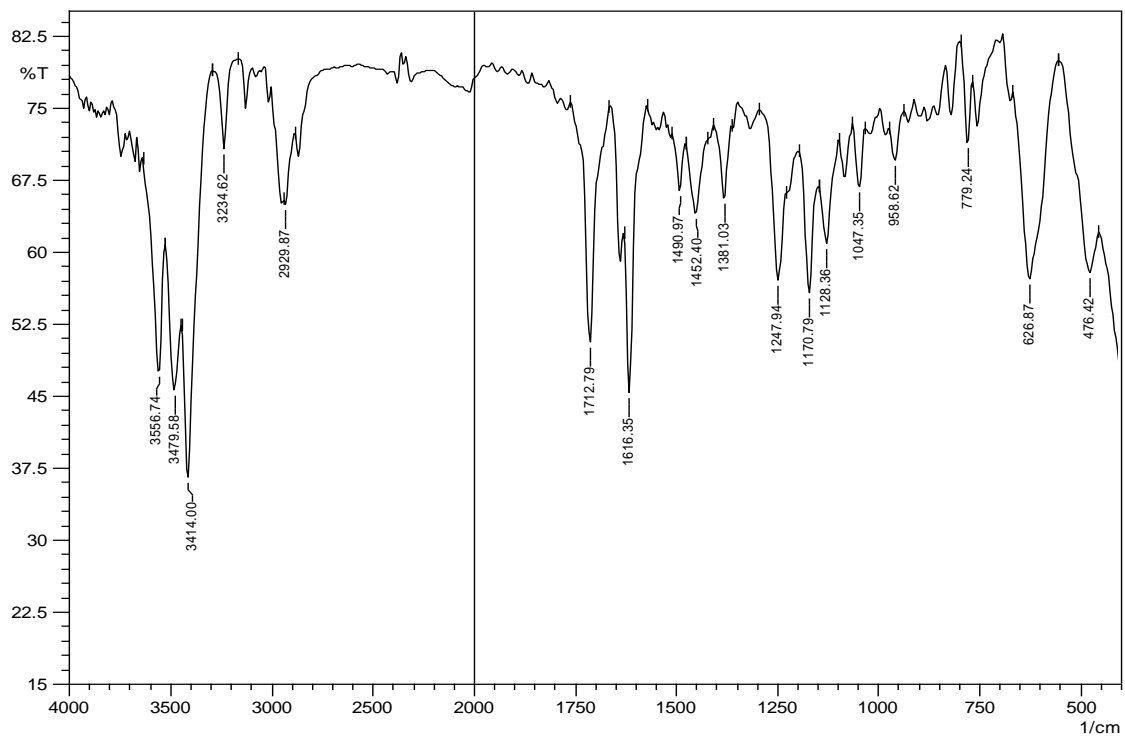

Figure S7. FTIR spectrum of 3c

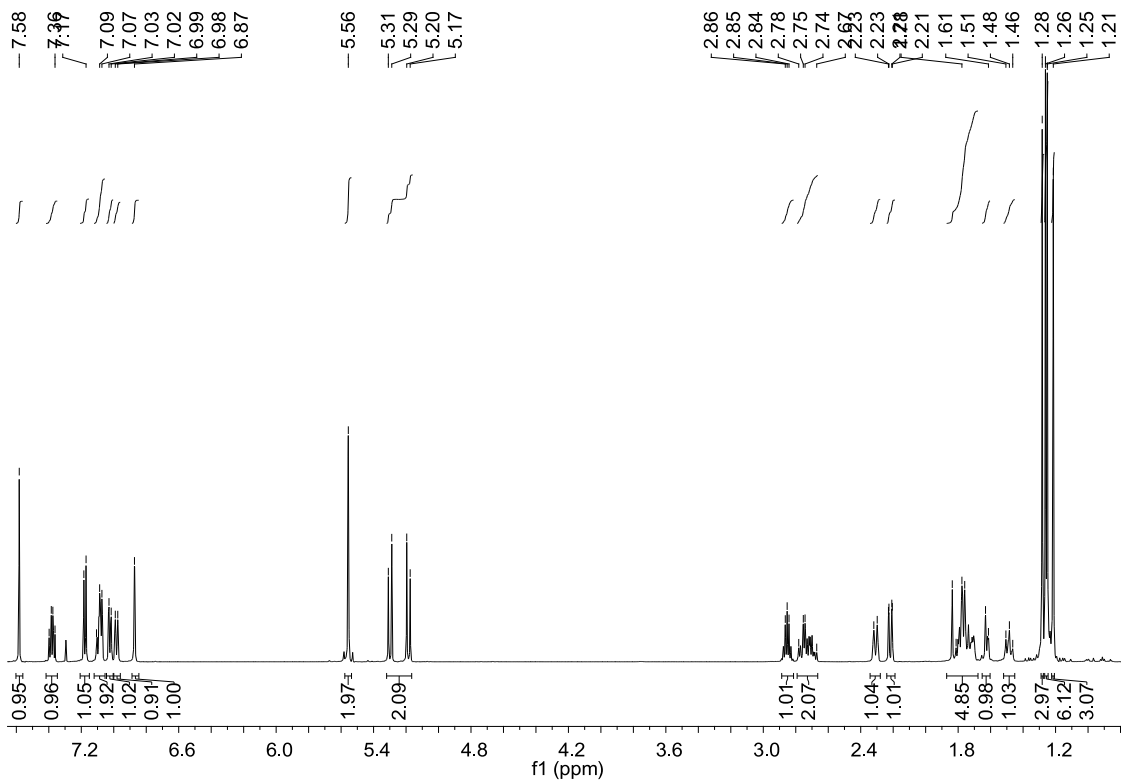

Figure S8. <sup>1</sup>H-NMR spectrum of 3c

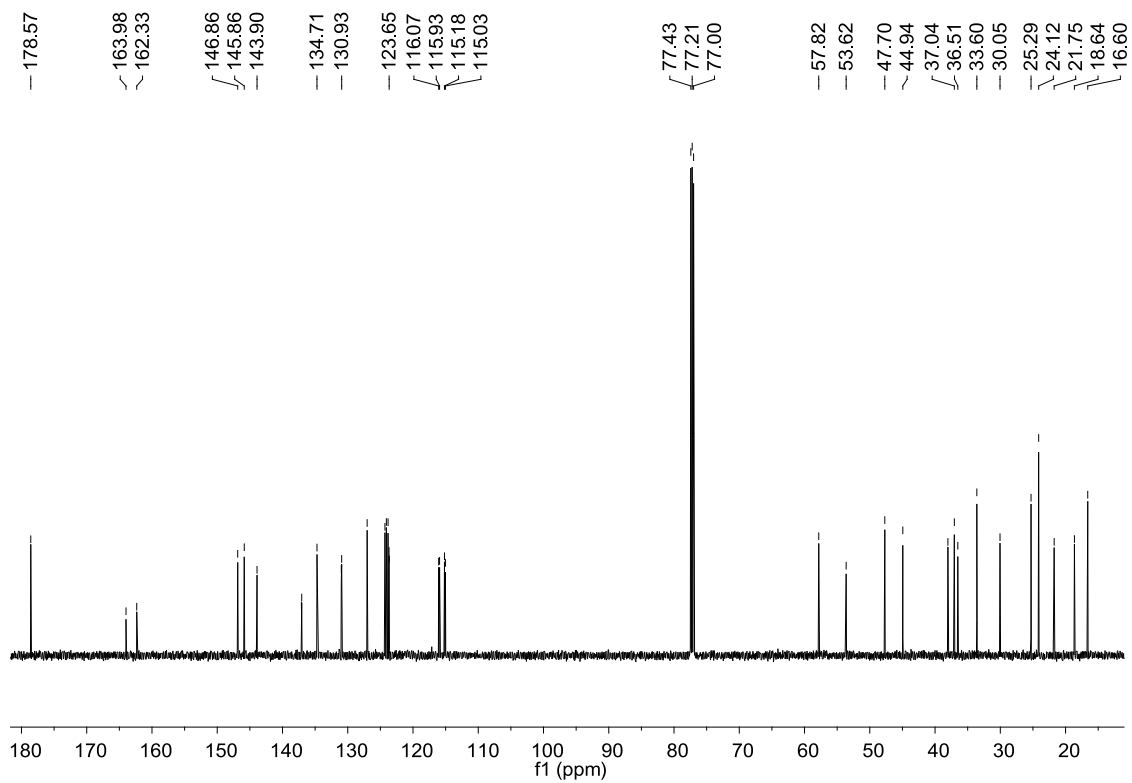

**Figure S9.**  $^{13}\text{C}$ -NMR spectrum of **3c**

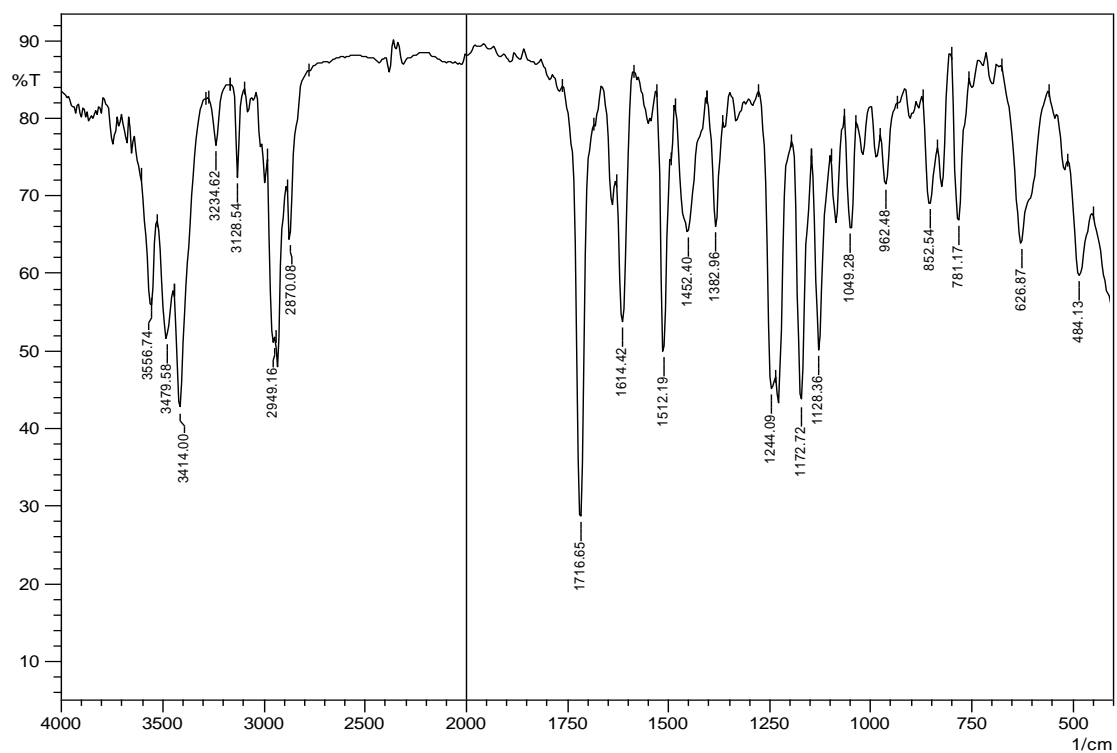

**Figure S10.** FTIR spectrum of **3d**

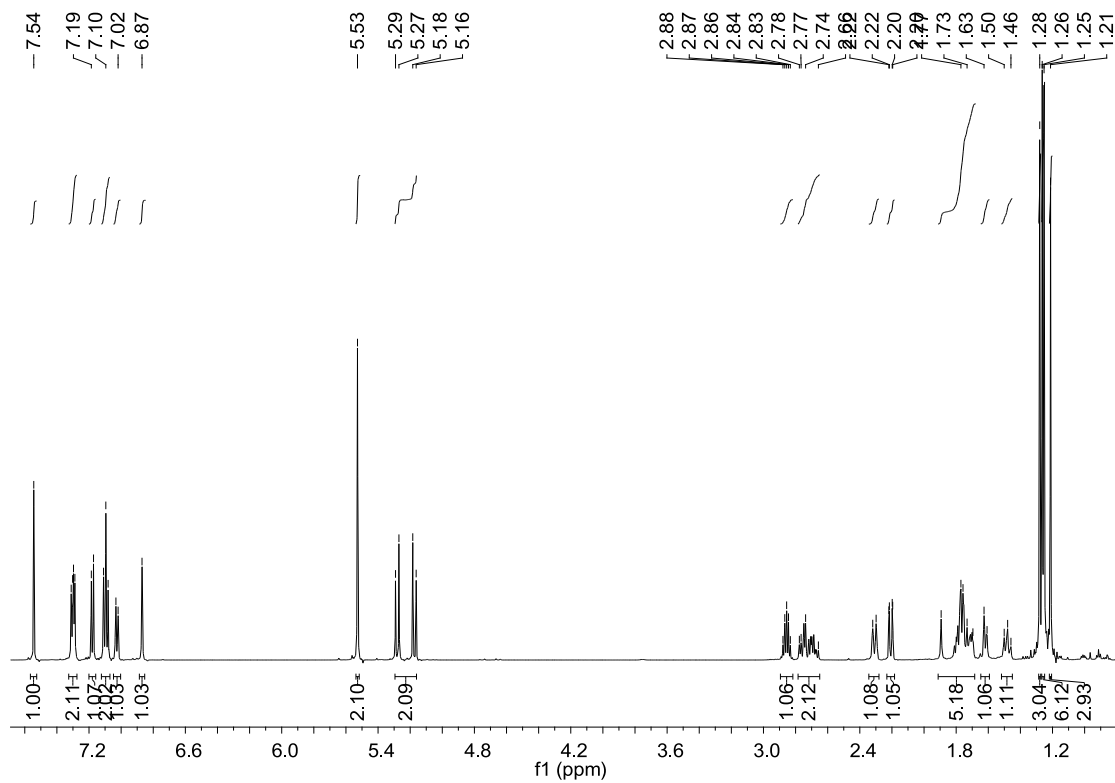

**Figure S11. <sup>1</sup>H-NMR spectrum of 3d**

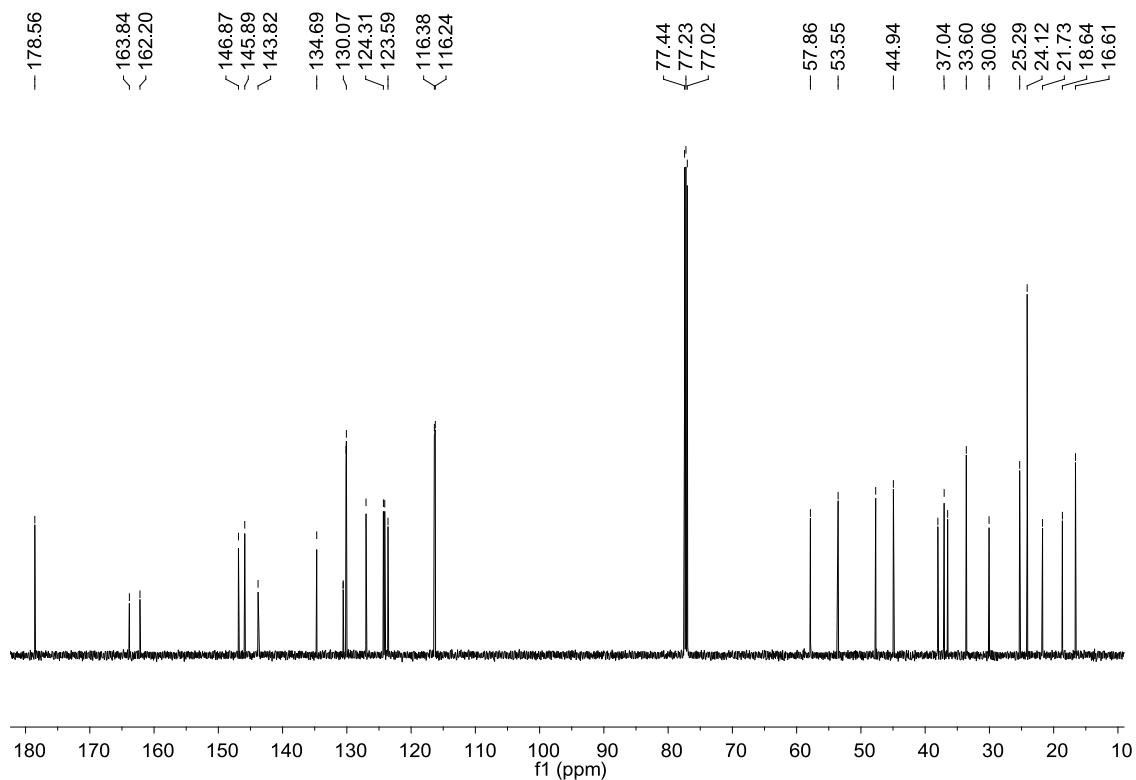

**Figure S12. <sup>13</sup>C-NMR spectrum of 3d**

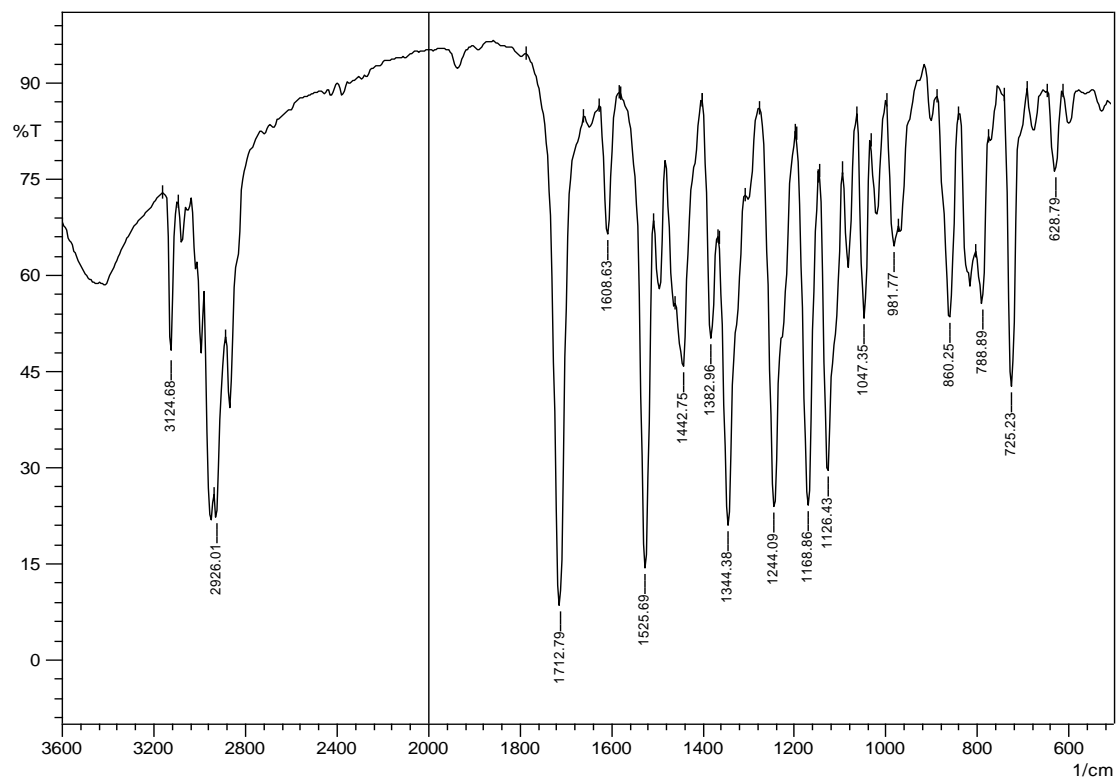

**Figure S13.** FTIR spectrum of **3e**

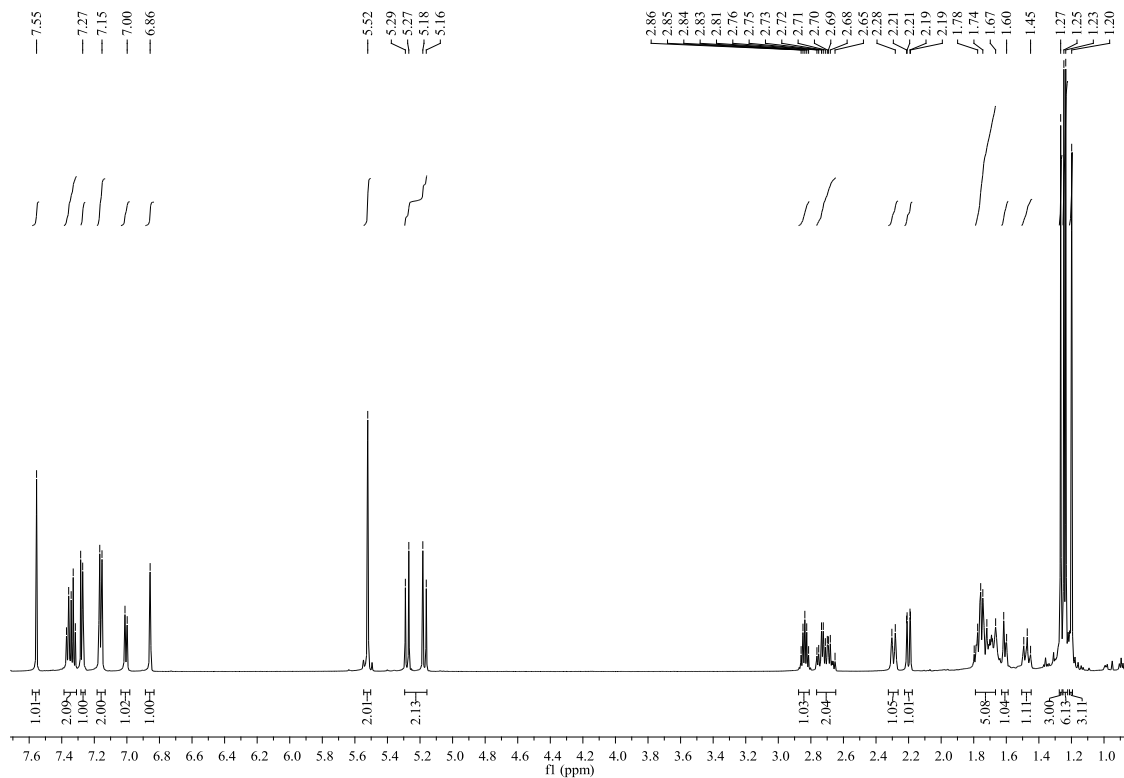

**Figure S14.** <sup>1</sup>H-NMR spectrum of **3e**

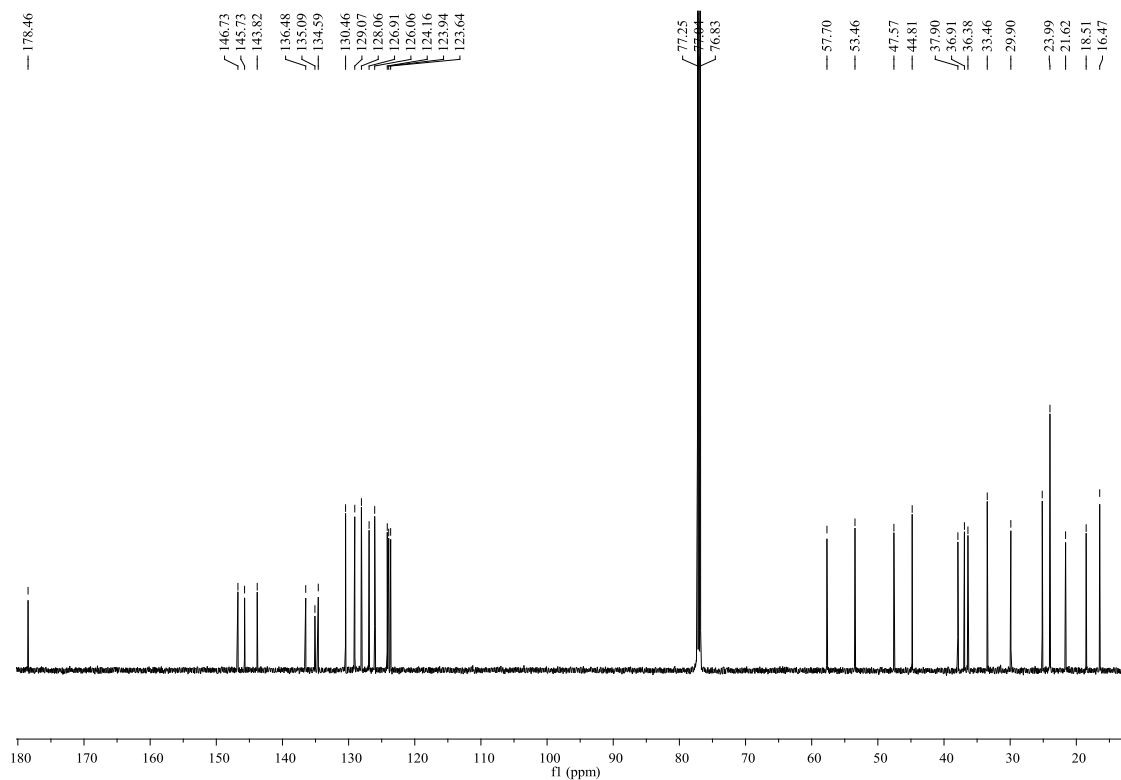

Figure S15.  $^{13}\text{C}$ -NMR spectrum of **3e**

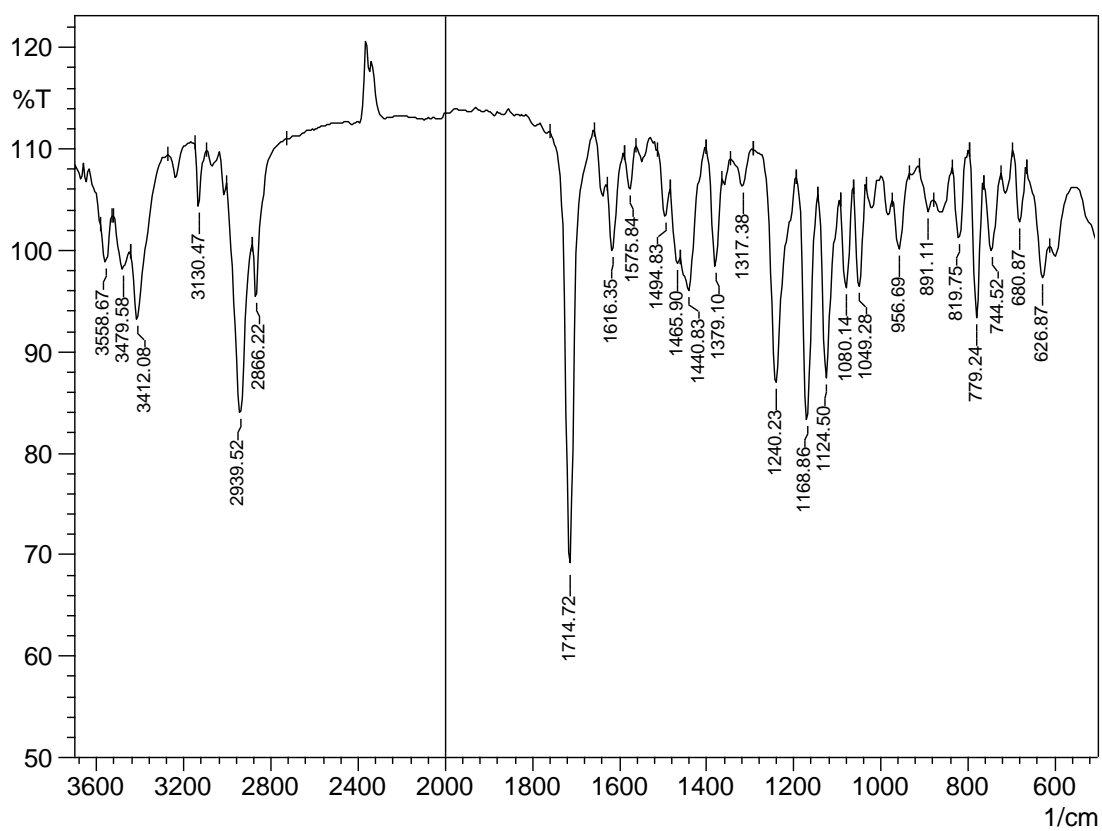

Figure S16. FTIR spectrum of **3f**



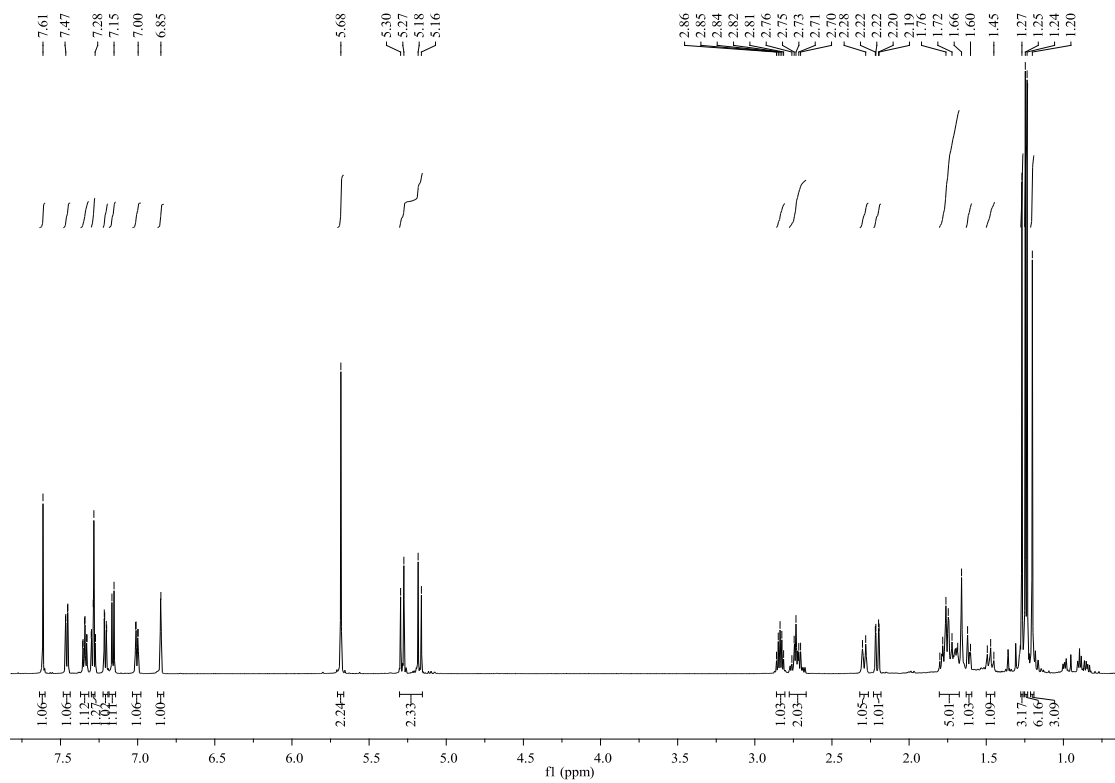

Figure S17.  $^1\text{H}$ -NMR spectrum of **3f**

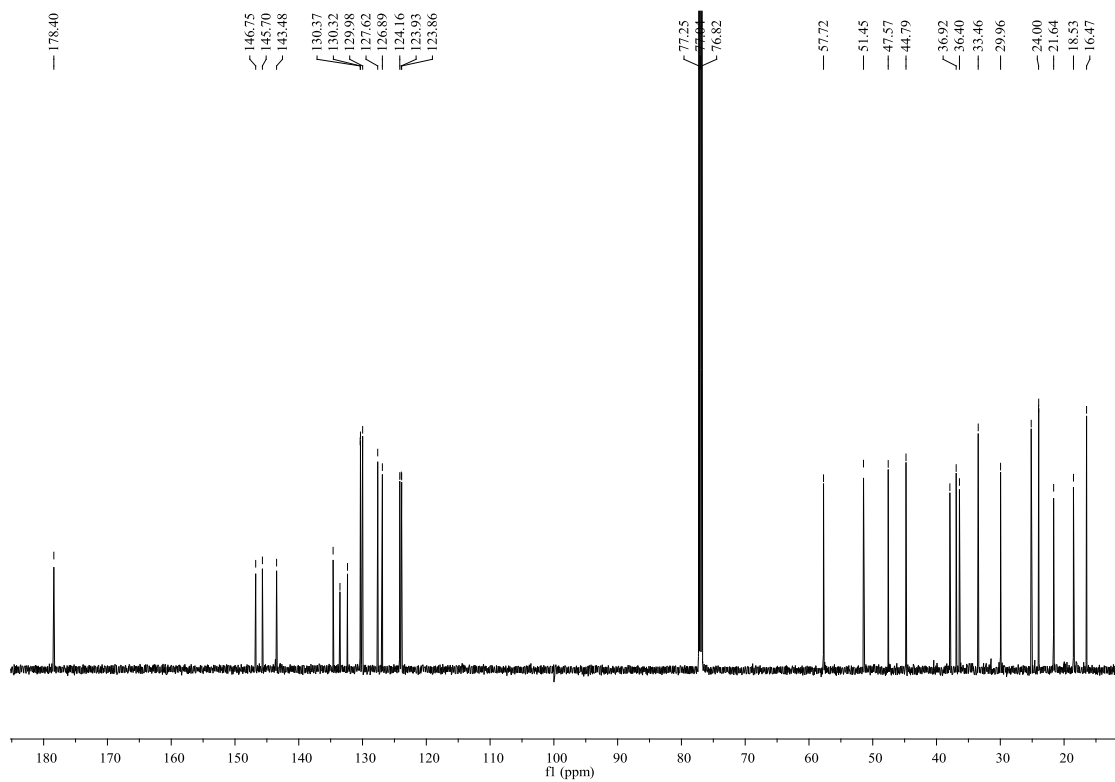

Figure S18.  $^{13}\text{C}$ -NMR spectrum of **3f**

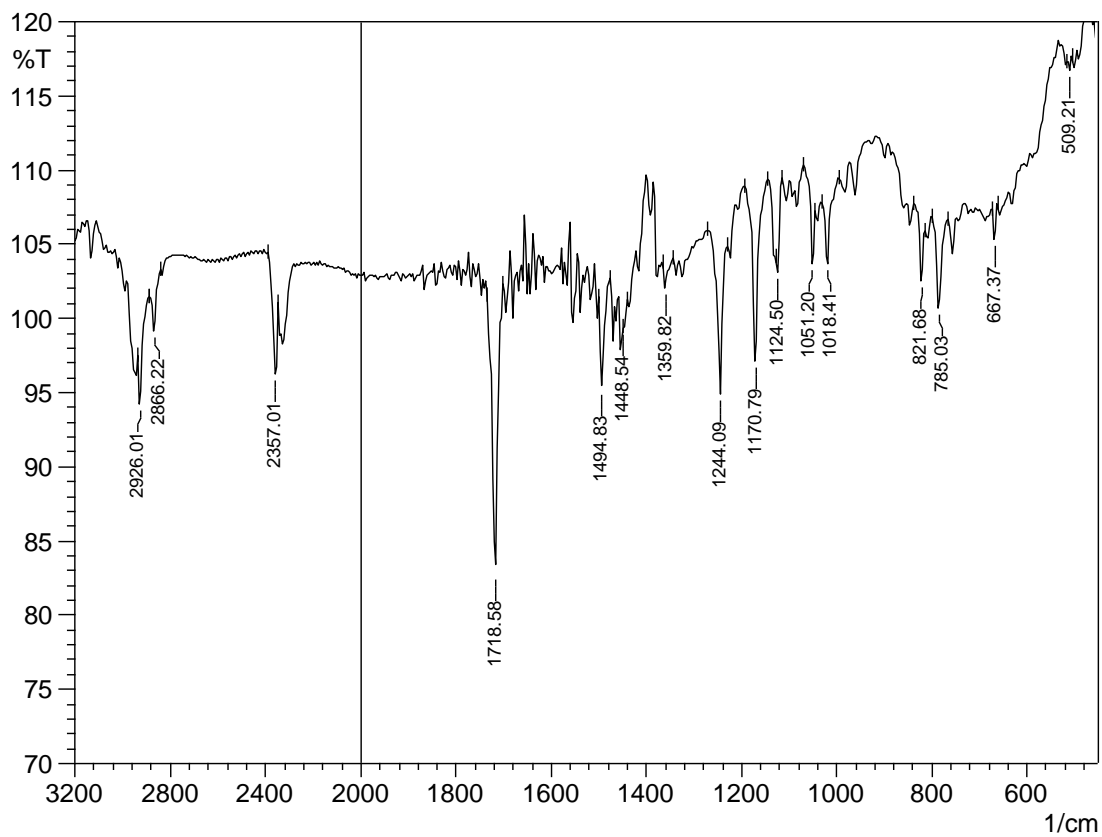

**Figure S19.** FTIR spectrum of **3g**

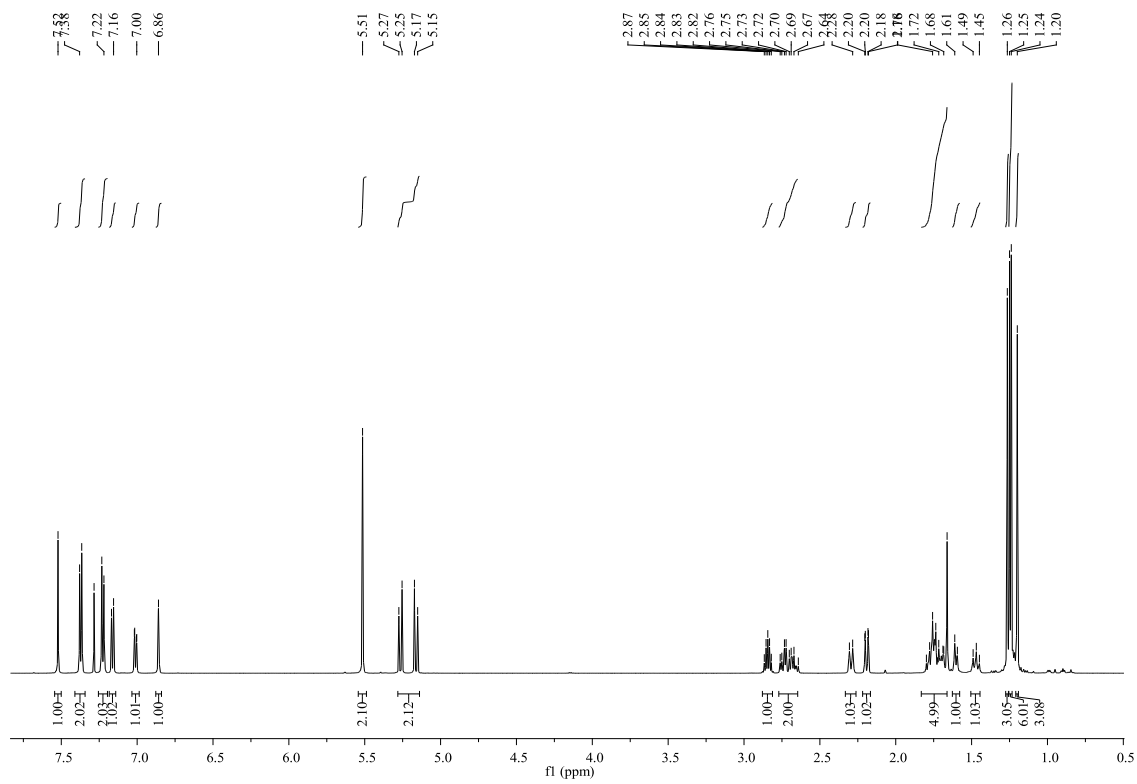

**Figure S20.** <sup>1</sup>H-NMR spectrum of **3g**

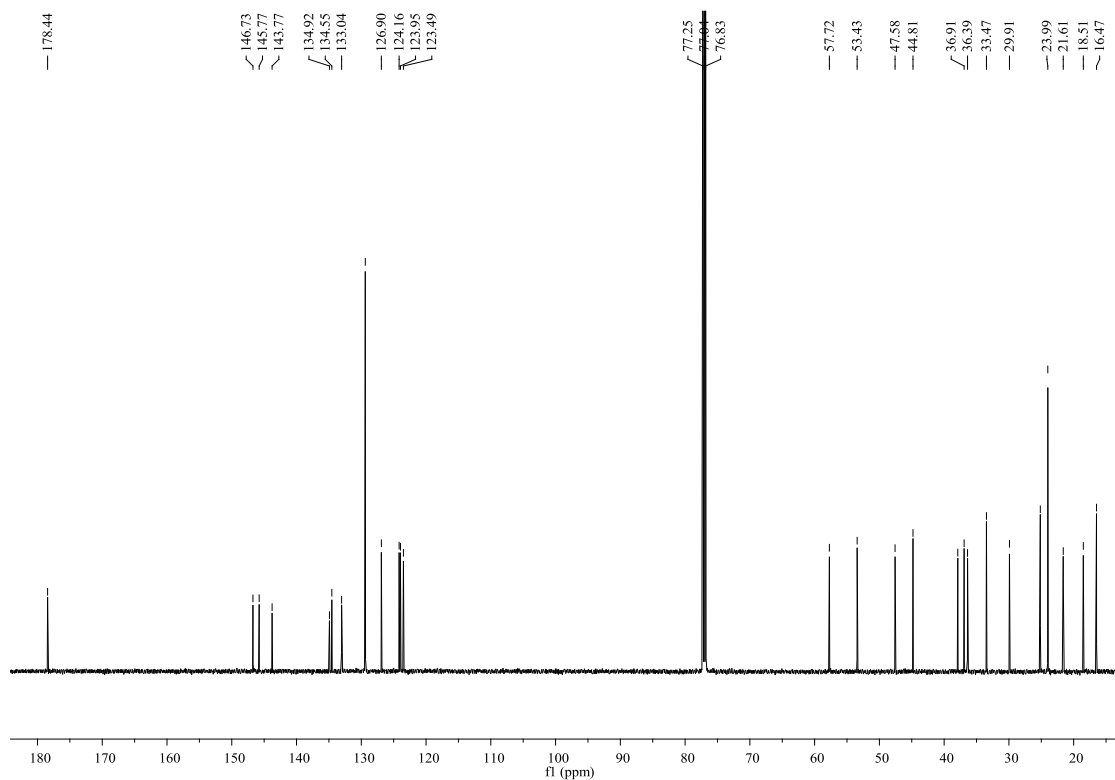

**Figure S21.**  $^{13}\text{C}$ -NMR spectrum of **3g**

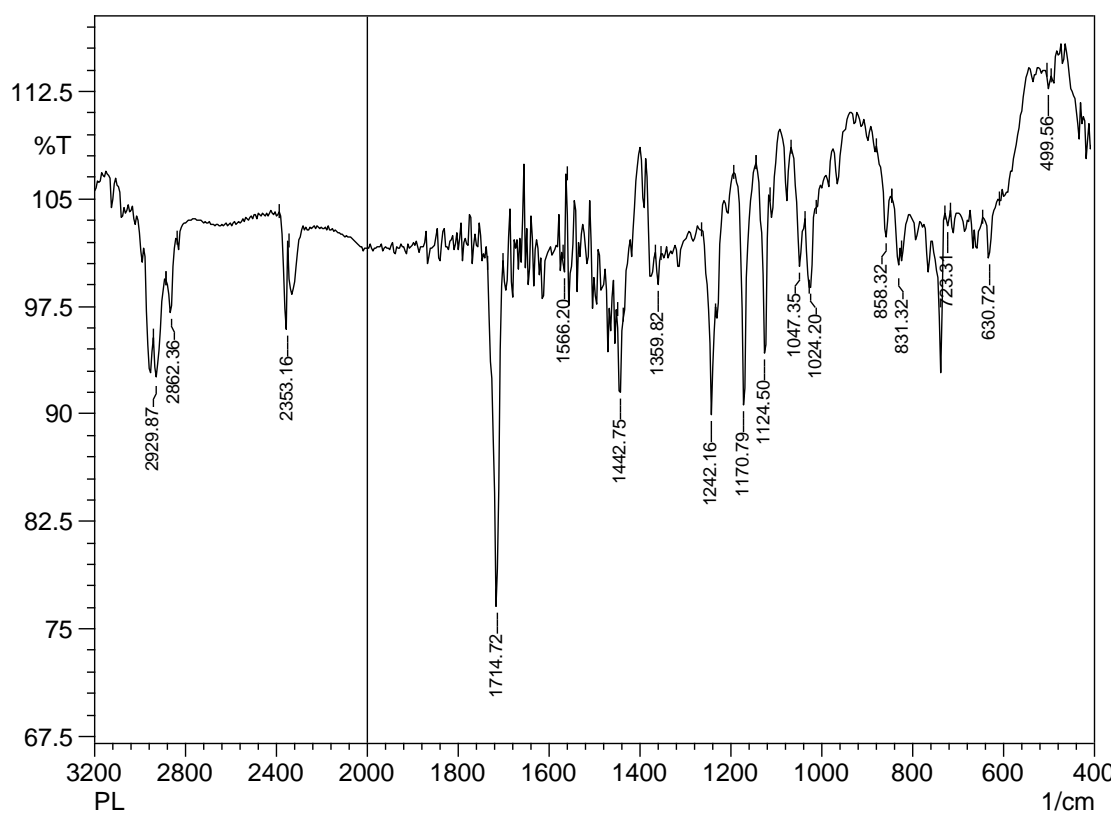

**Figure S22.** FTIR spectrum of **3h**

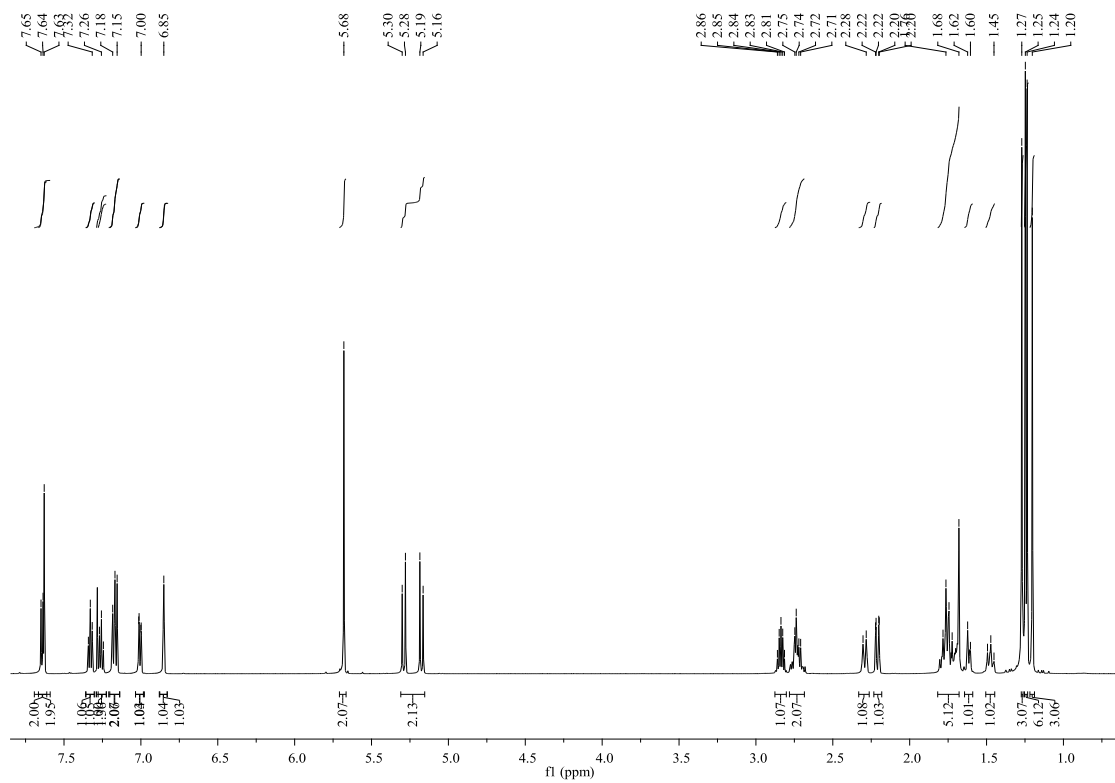

**Figure S23.  $^1\text{H-NMR}$  spectrum of **3h****

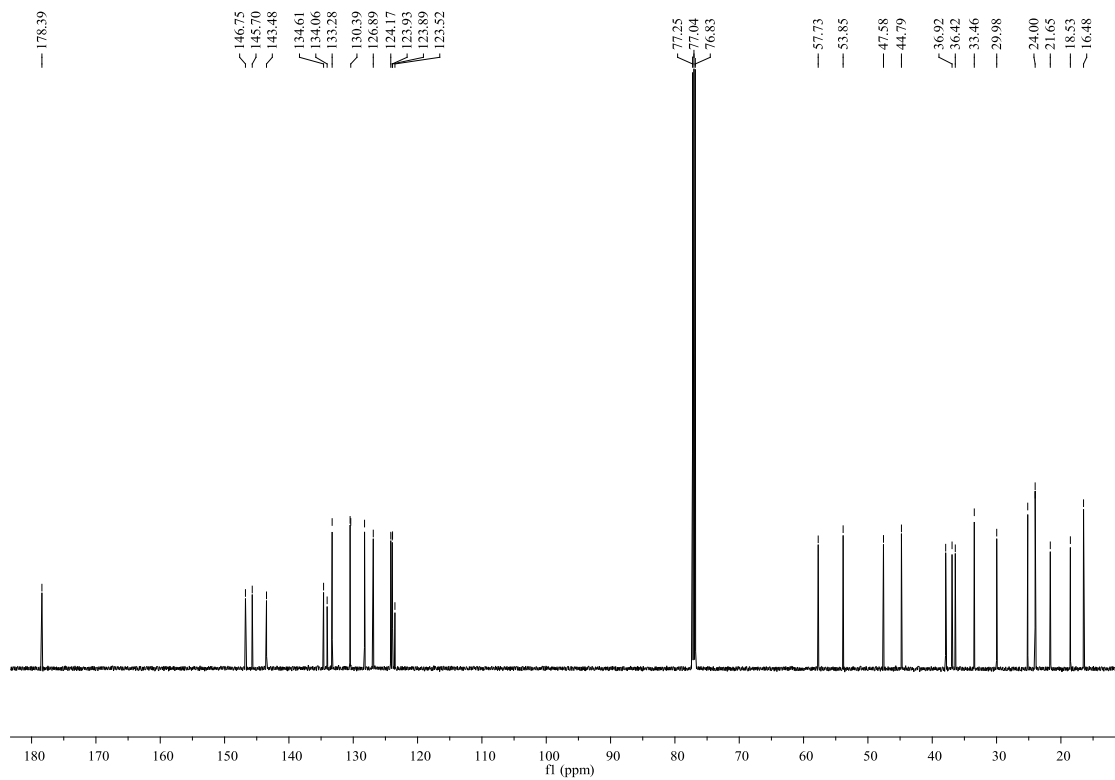

**Figure S24.  $^{13}\text{C-NMR}$  spectrum of **3h****

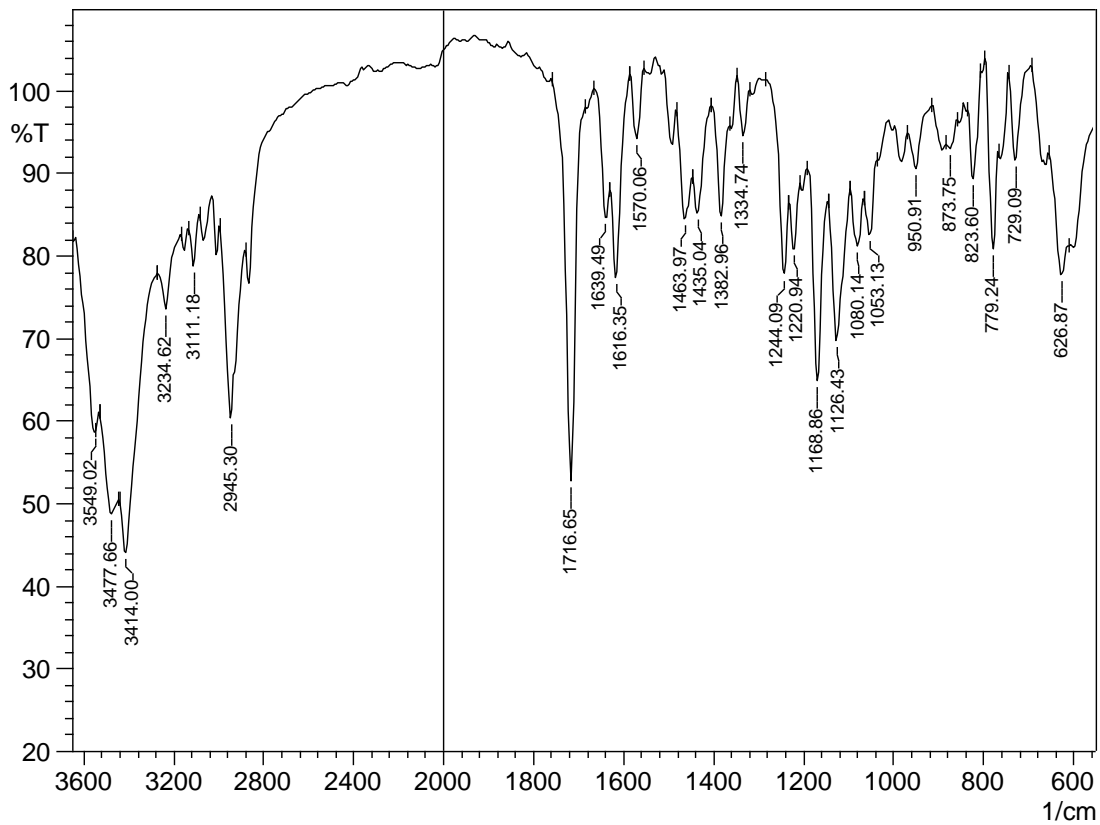

**Figure S25.** FTIR spectrum of **3i**

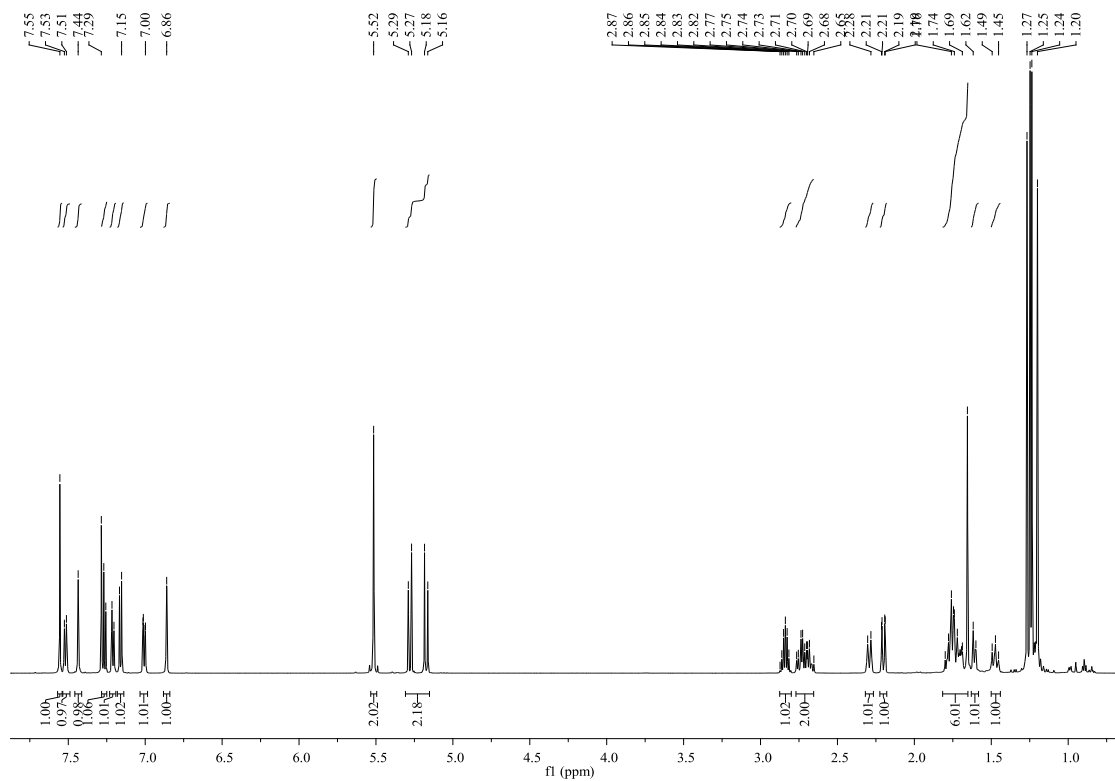

**Figure S26.** <sup>1</sup>H-NMR spectrum of **3i**

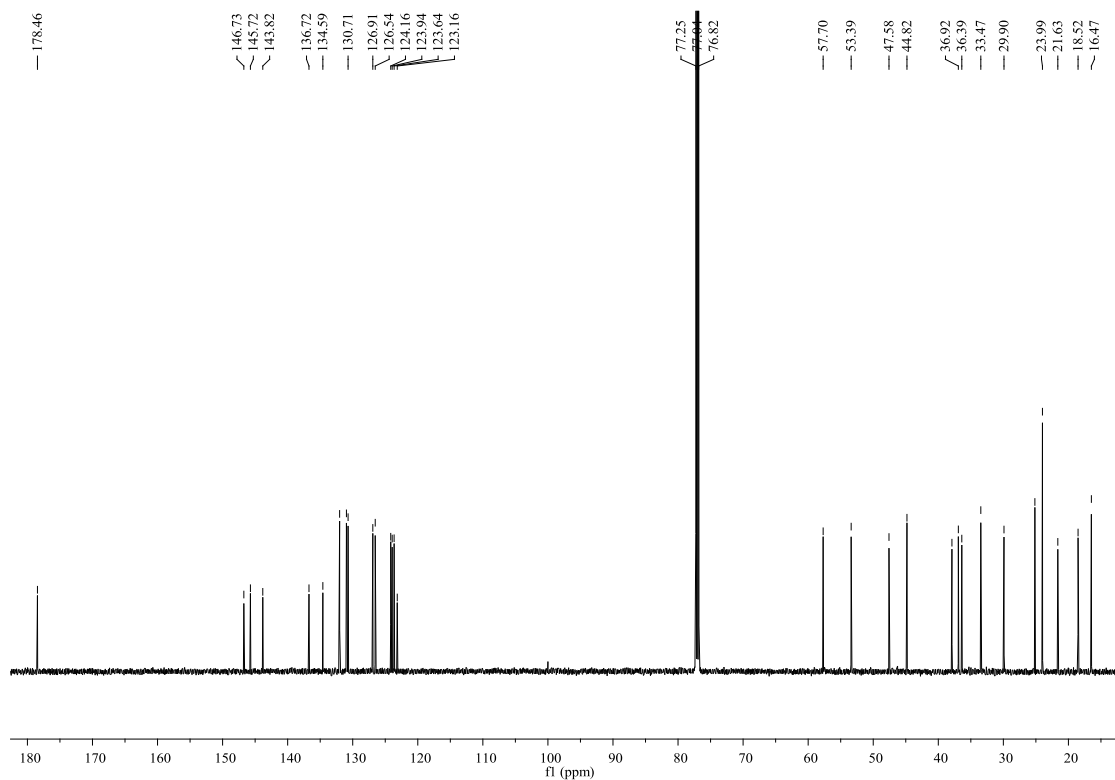

**Figure S27.**  $^{13}\text{C}$ -NMR spectrum of **3i**

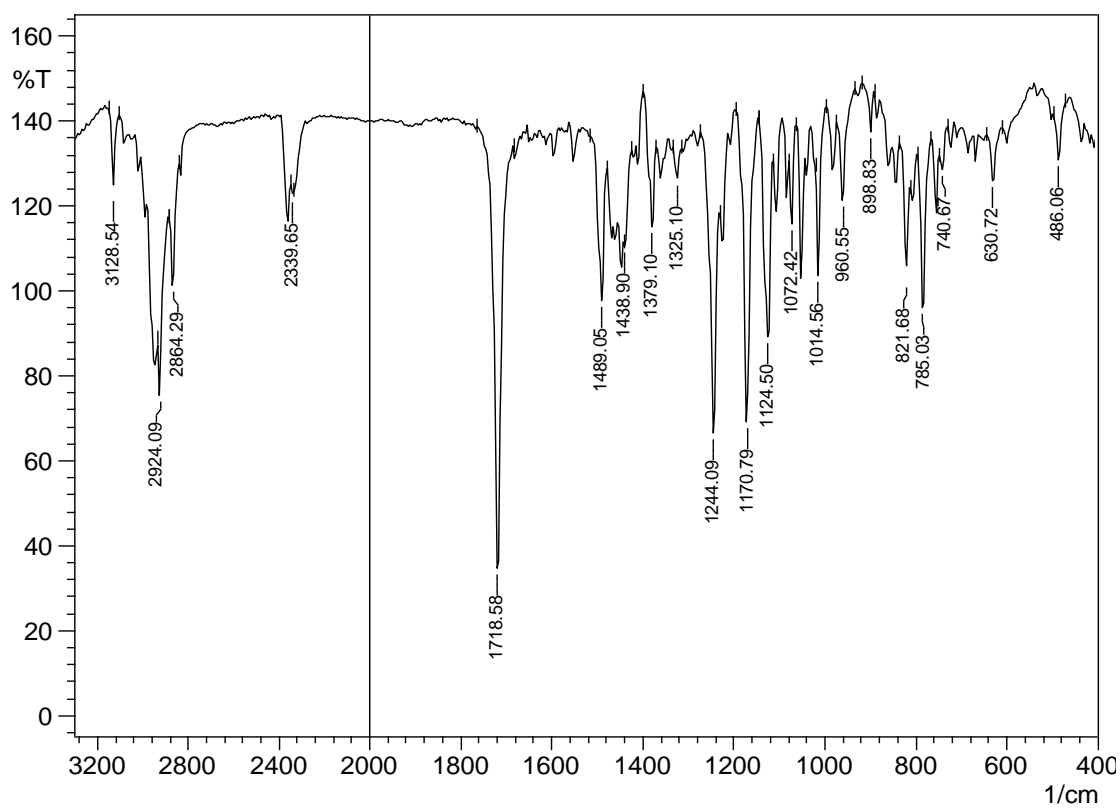

**Figure S28.** FTIR spectrum of **3j**

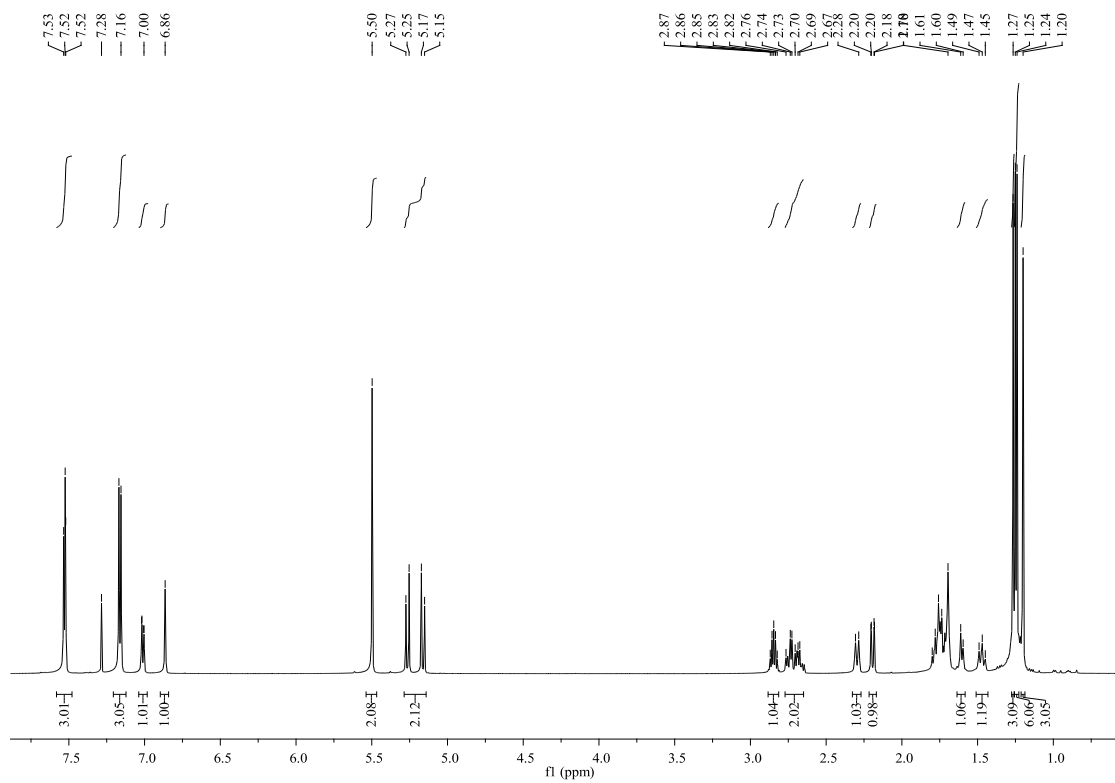

**Figure S29.  $^1\text{H}$ -NMR spectrum of **3j****

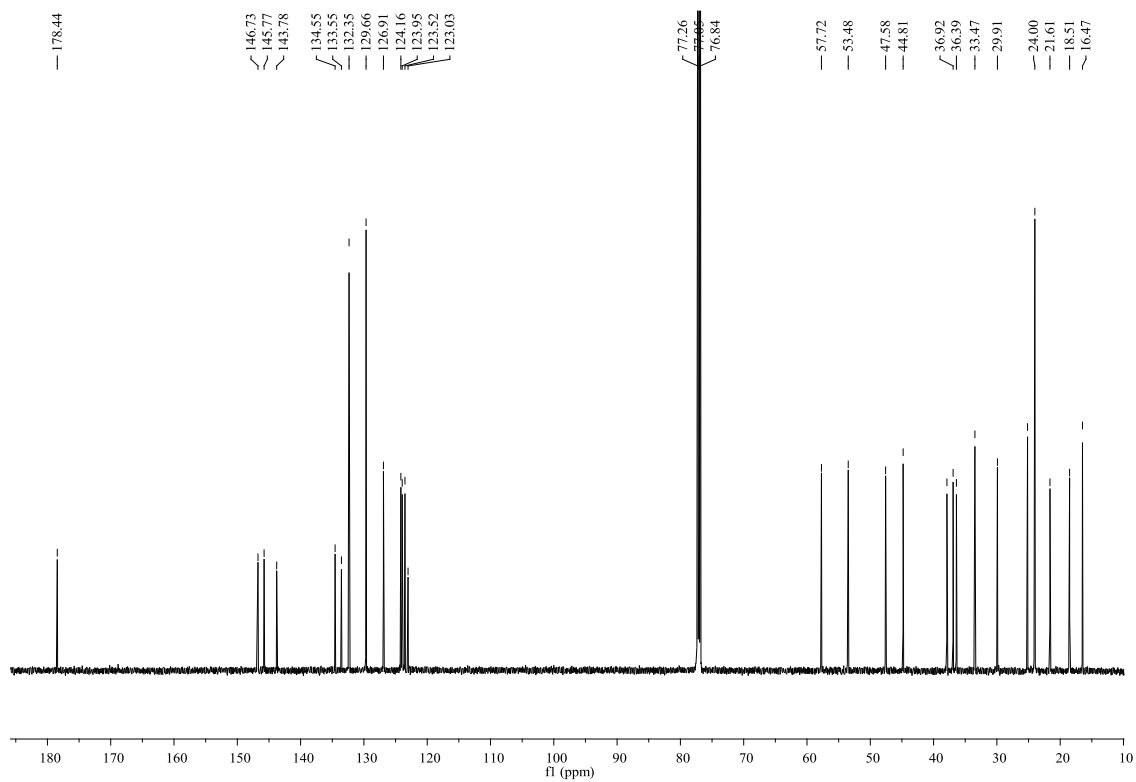

**Figure S30.  $^{13}\text{C}$ -NMR spectrum of **3j****

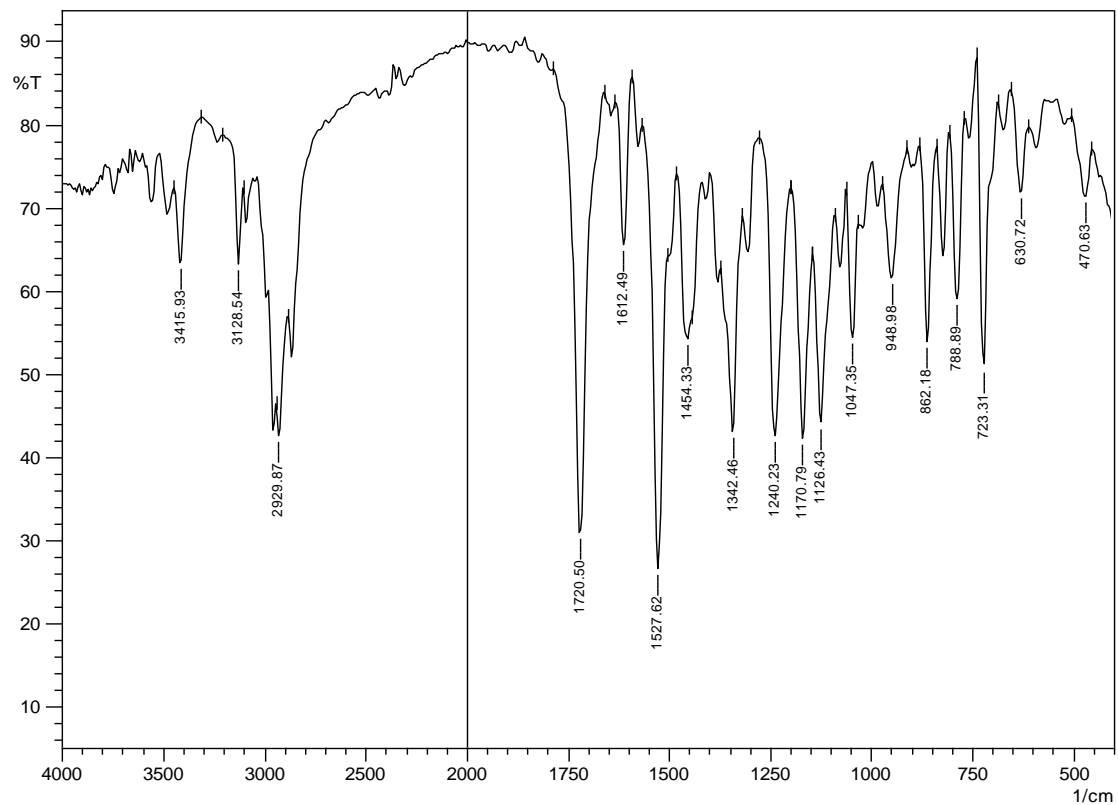

Figure S31. FTIR spectrum of 3k

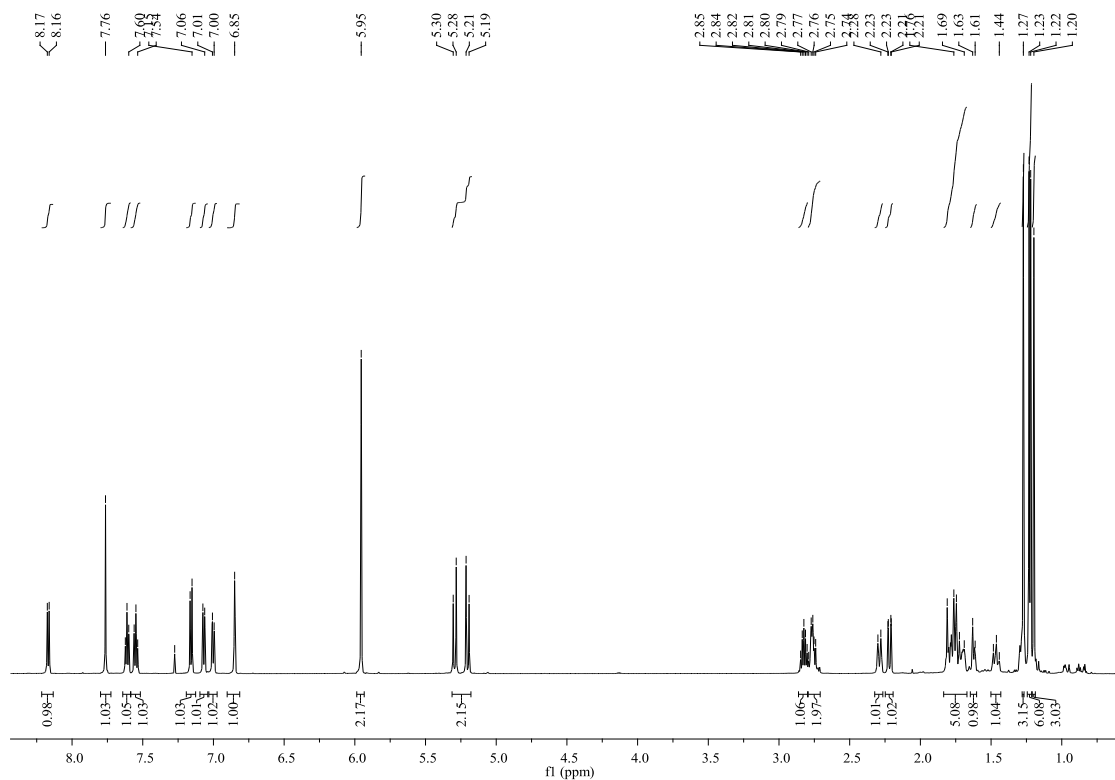

Figure S32. <sup>1</sup>H-NMR spectrum of 3k



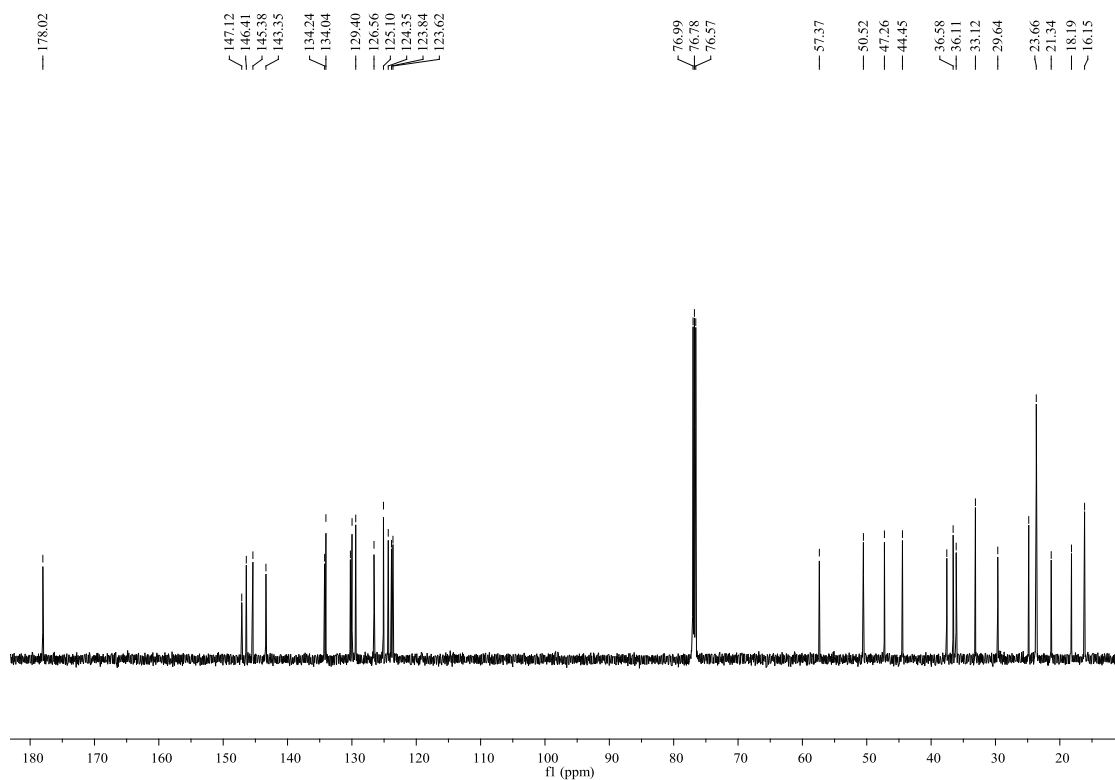

Figure S33.  $^{13}\text{C}$ -NMR spectrum of **3k**

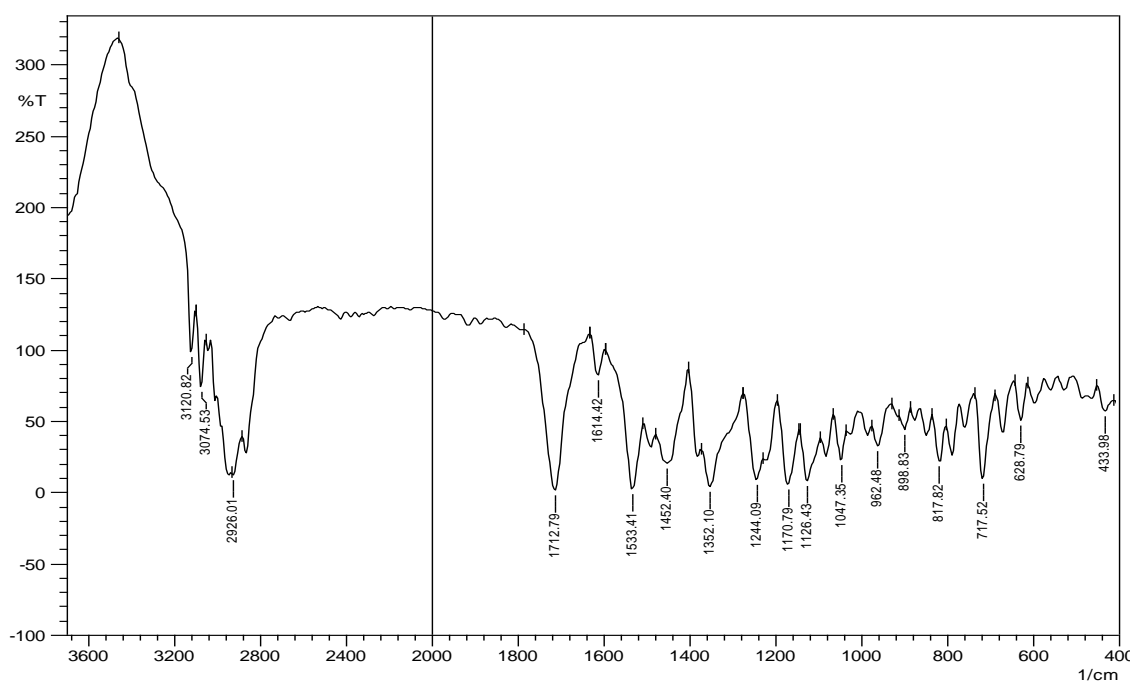

Figure S34. FTIR spectrum of **3l**

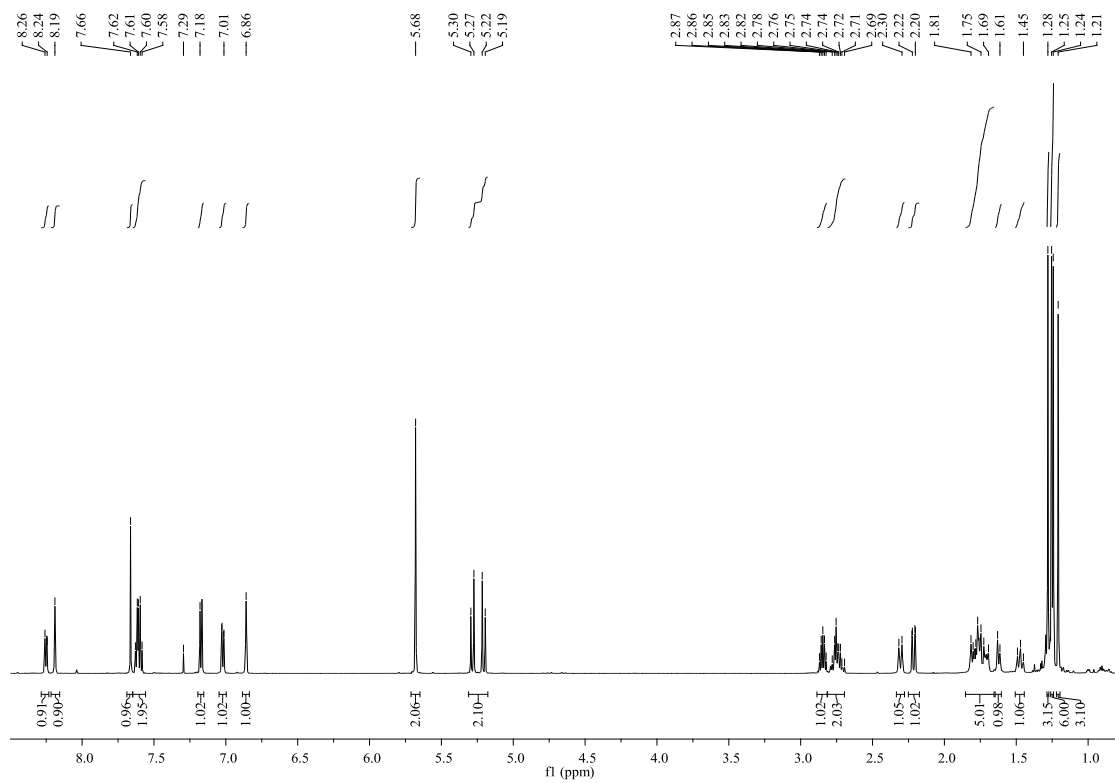

**Figure S35. <sup>1</sup>H-NMR spectrum of 31**

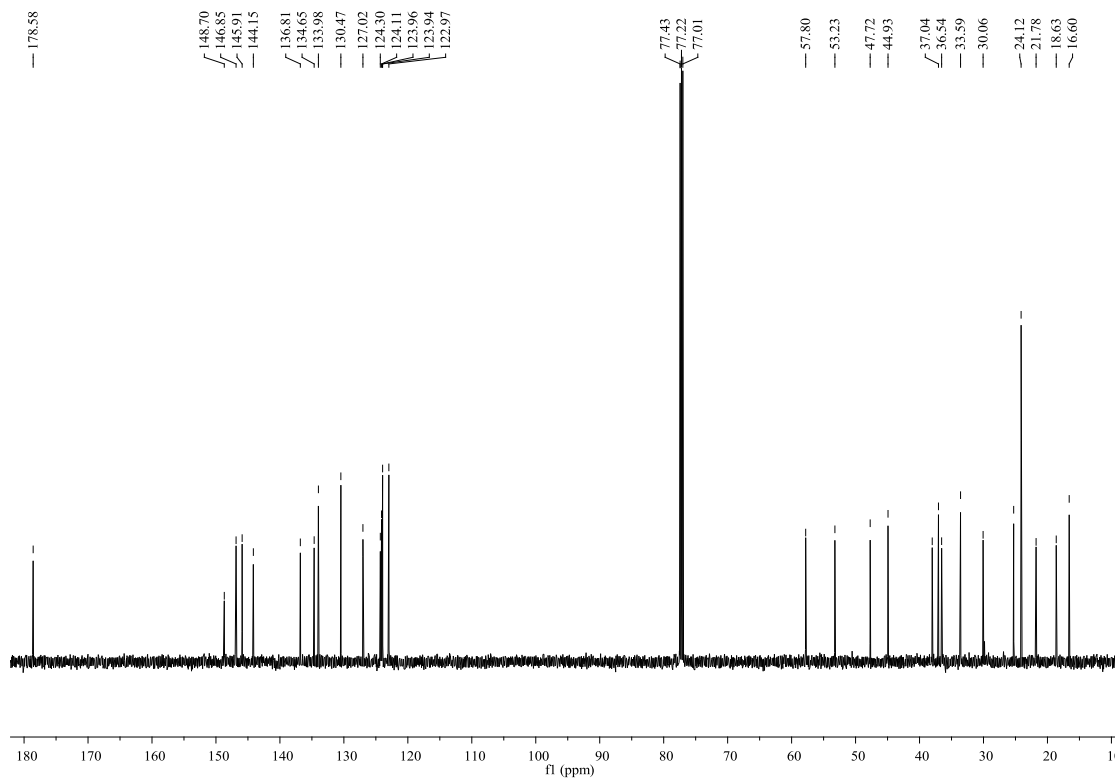

**Figure S36. <sup>13</sup>C-NMR spectrum of 31**

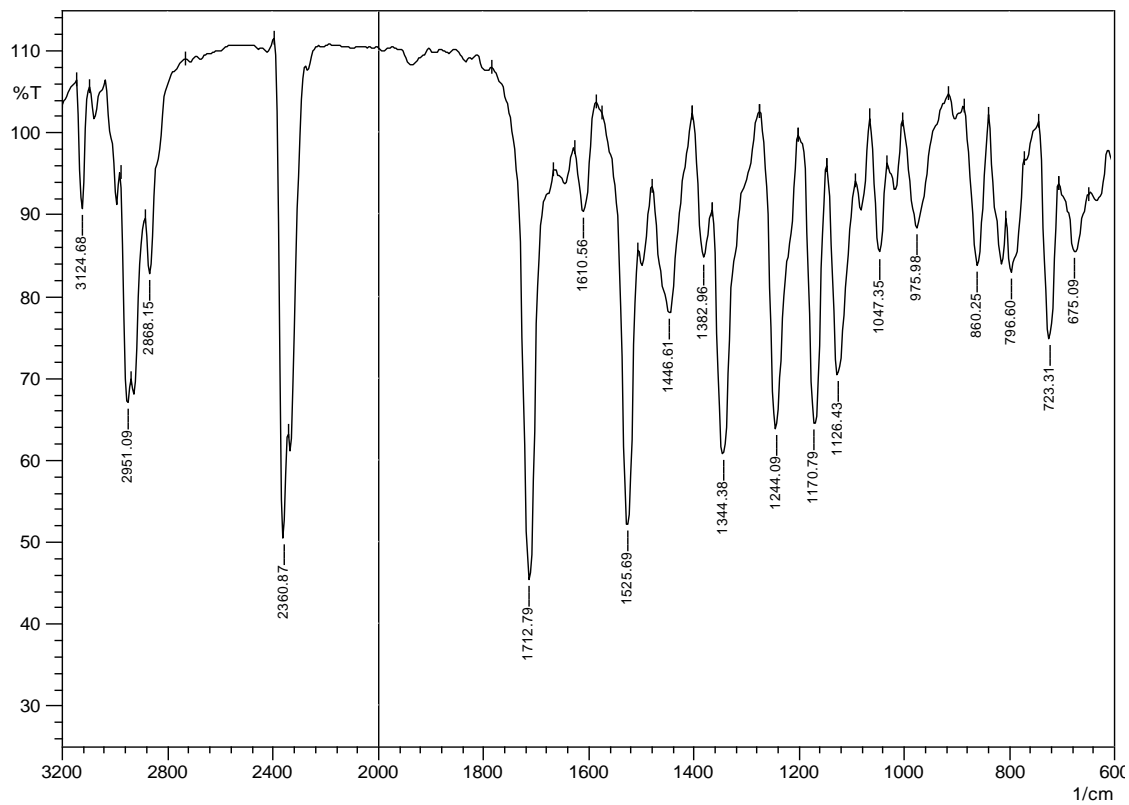

Figure S37. FTIR spectrum of 3m

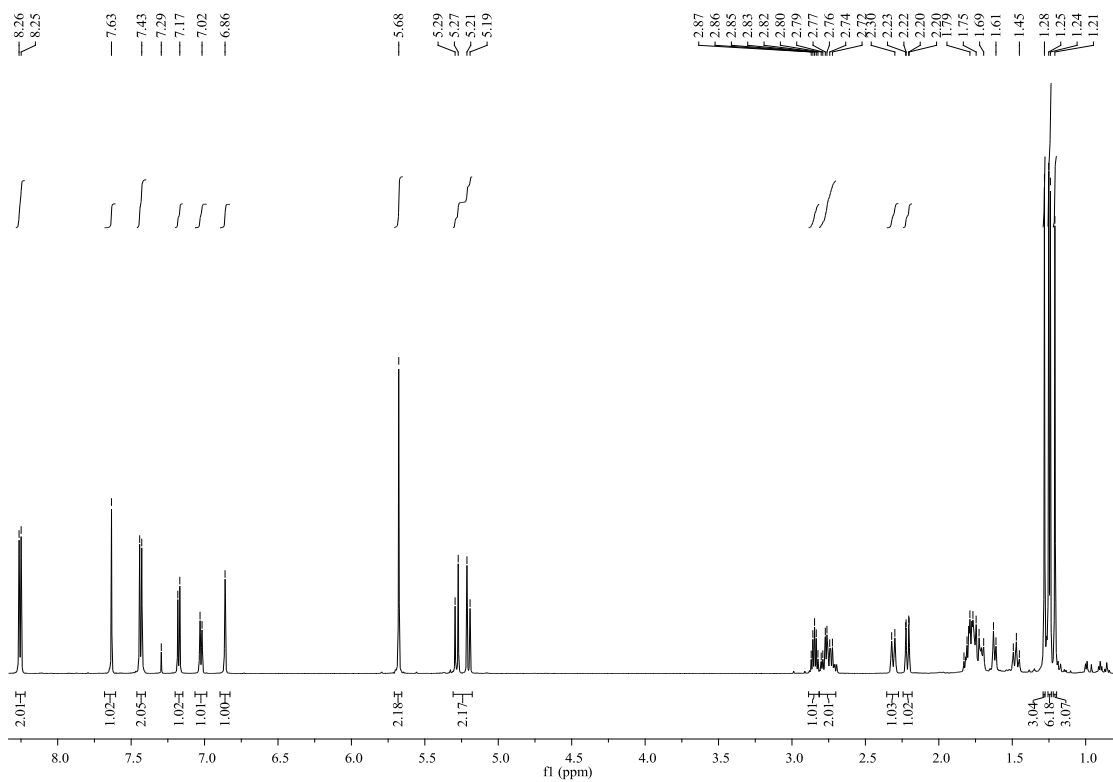

Figure S38. <sup>1</sup>H-NMR spectrum of 3m

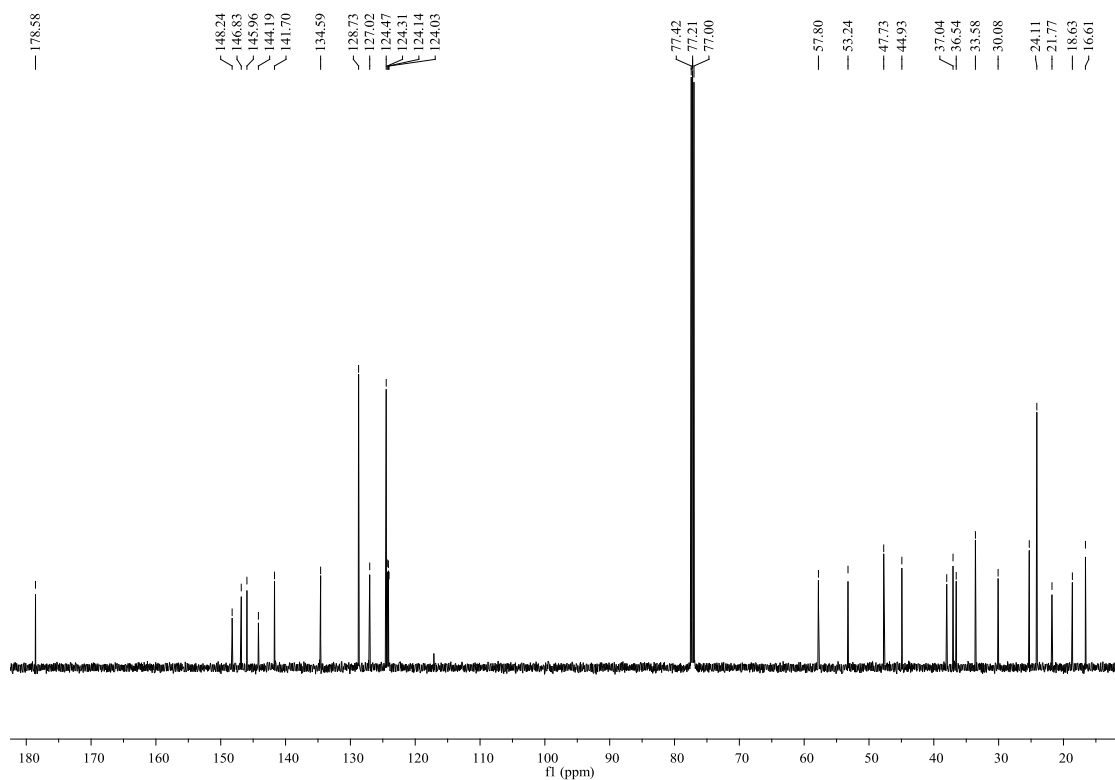

**Figure S39.**  $^{13}\text{C}$ -NMR spectrum of **3m**

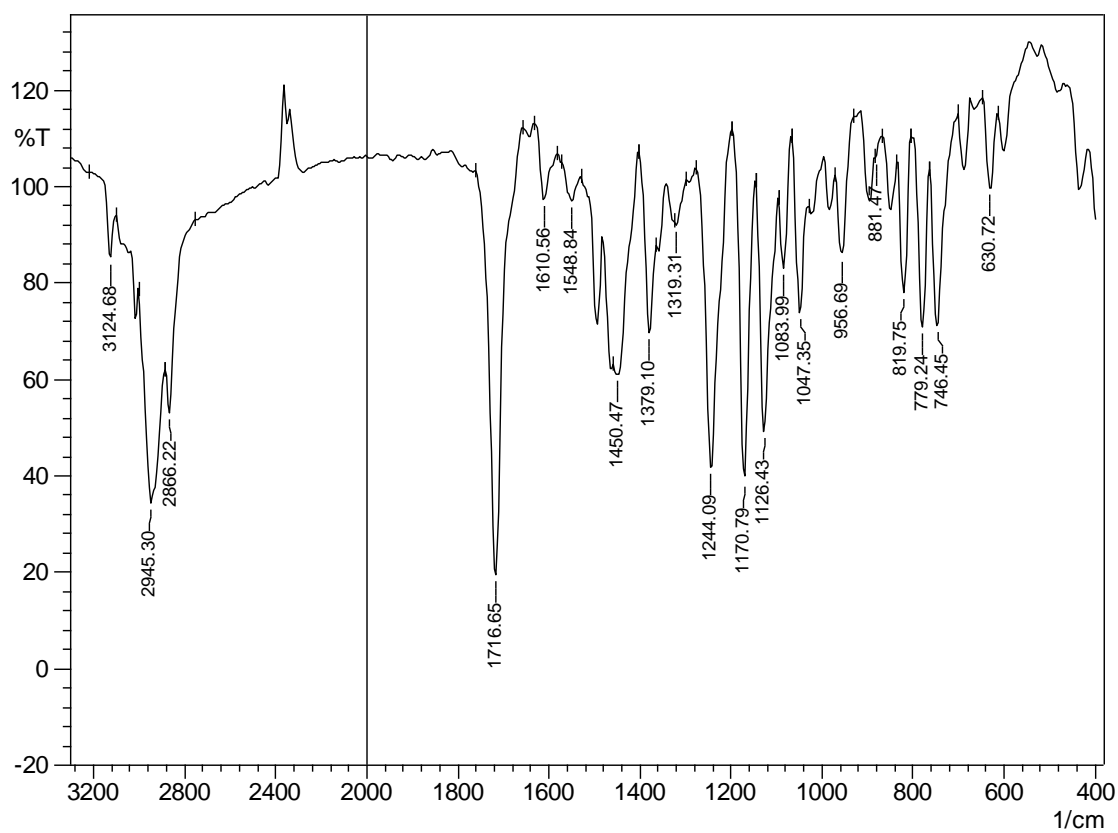

**Figure S40.** FTIR spectrum of **3n**

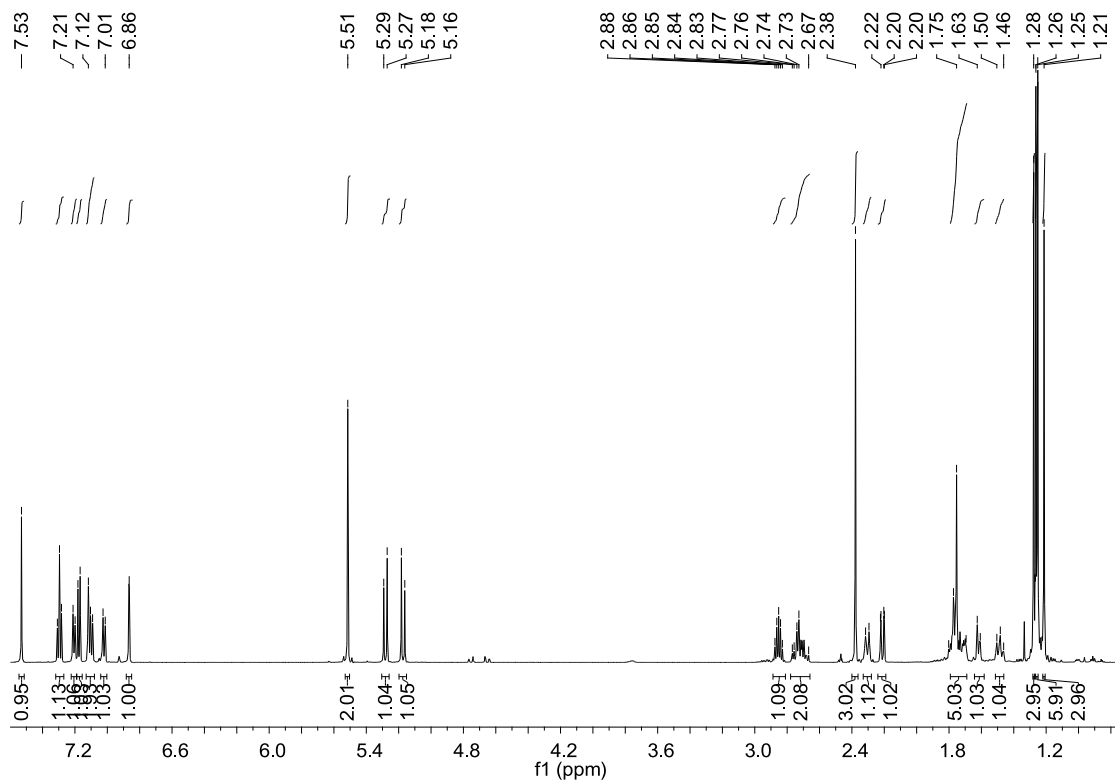

**Figure S41.  $^1\text{H-NMR}$  spectrum of 3n**

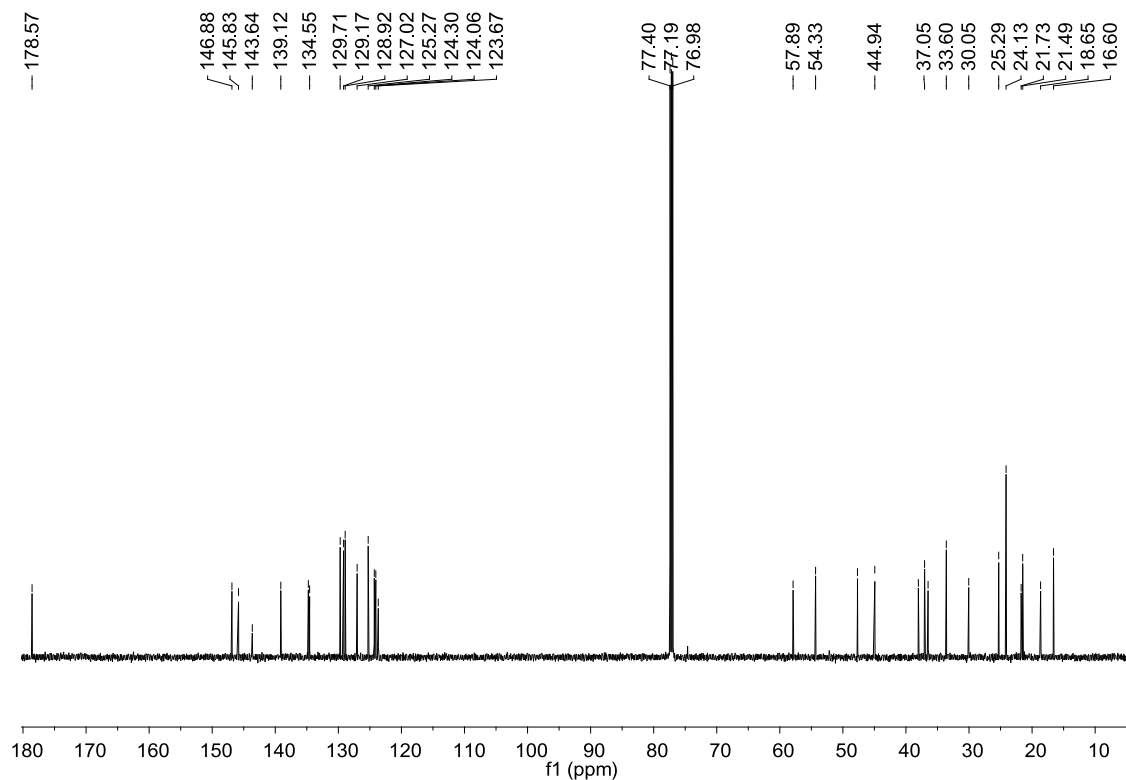

**Figure S42.  $^{13}\text{C-NMR}$  spectrum of 3n**

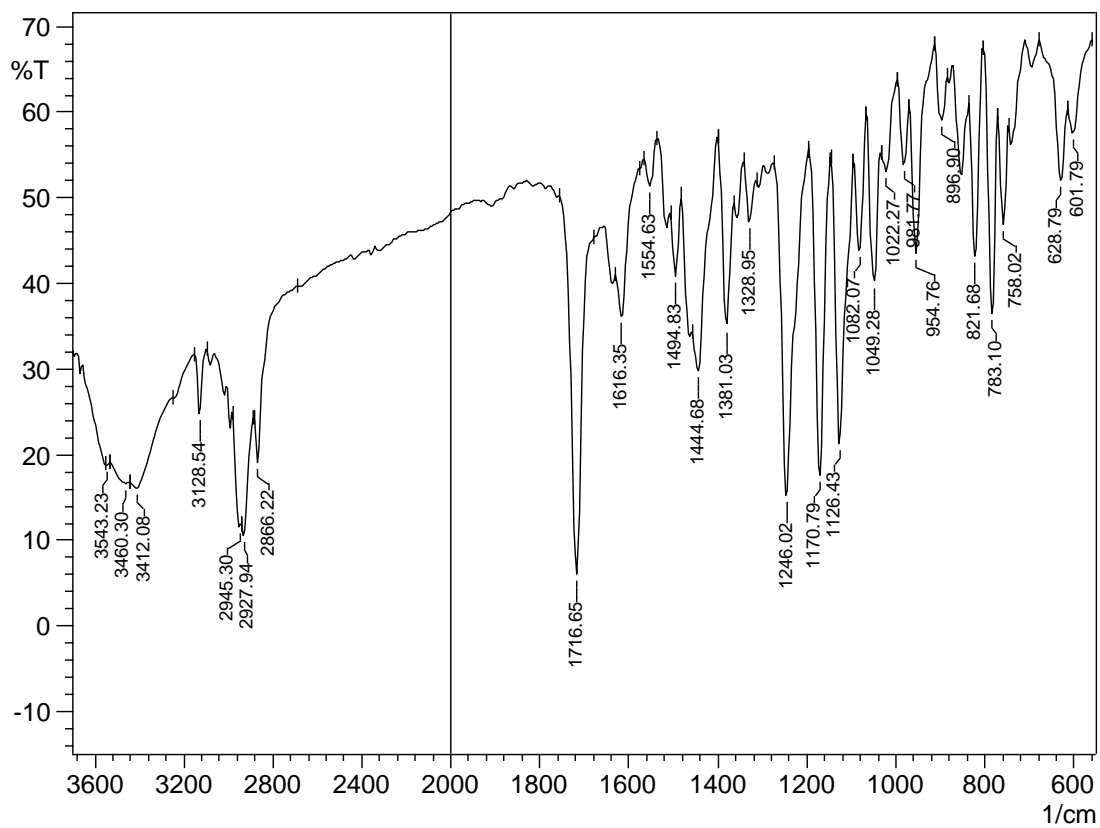

Figure S43. FTIR spectrum of **3o**

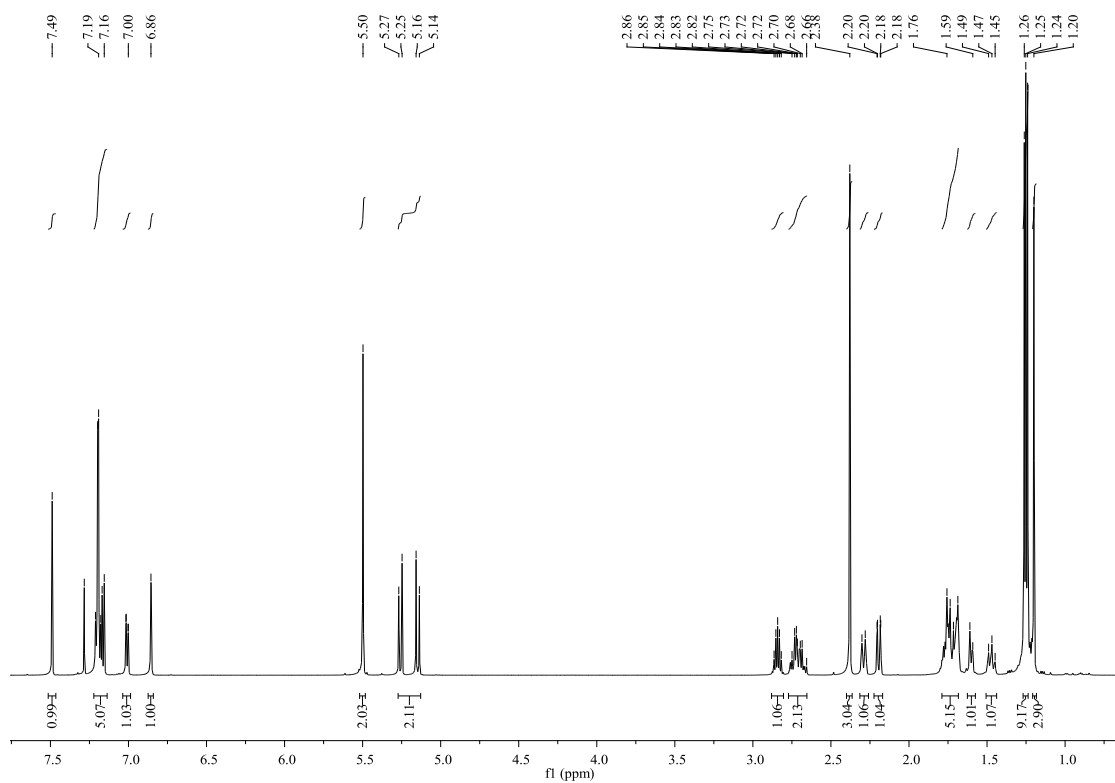

Figure S44.  $^1\text{H-NMR}$  spectrum of **3o**

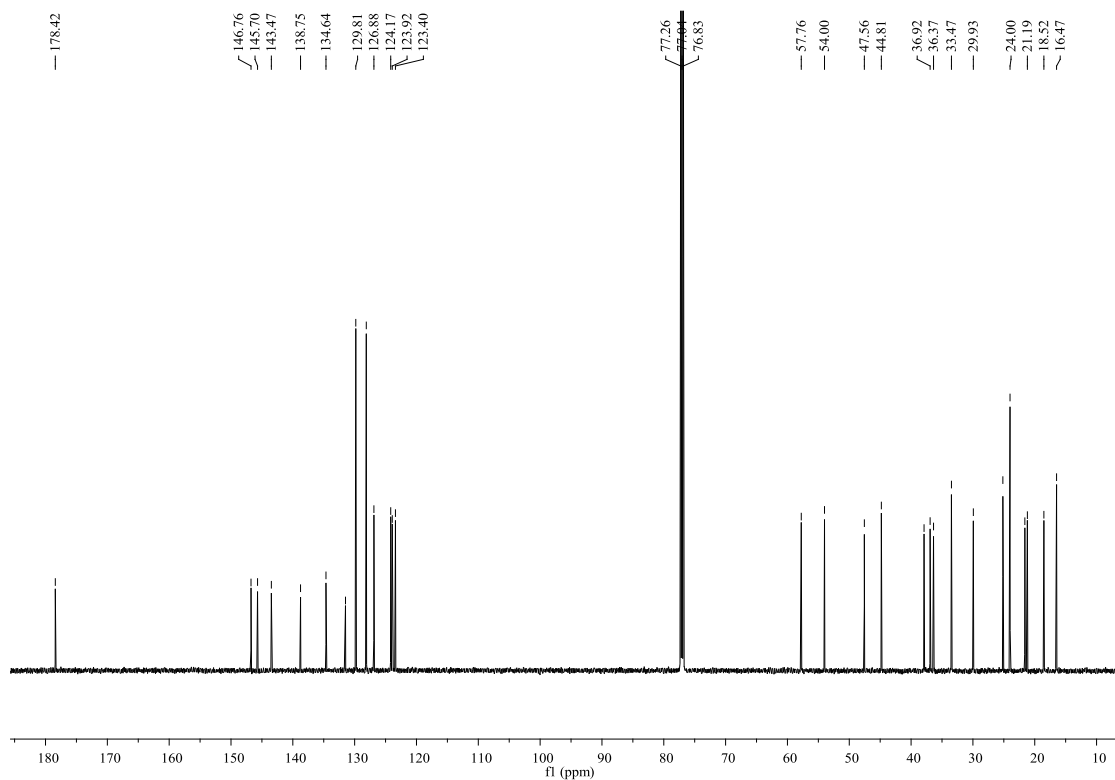

Figure S45.  $^{13}\text{C-NMR}$  spectrum of **3o**

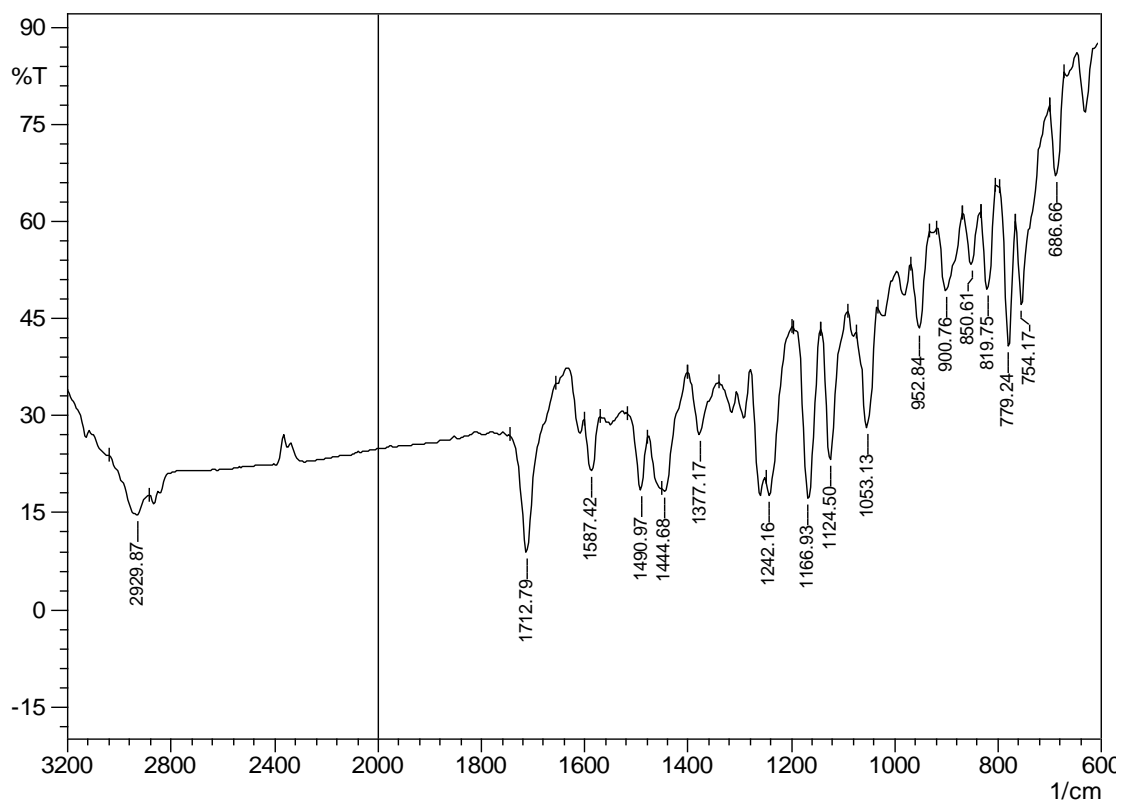

Figure S46. FTIR spectrum of **3p**

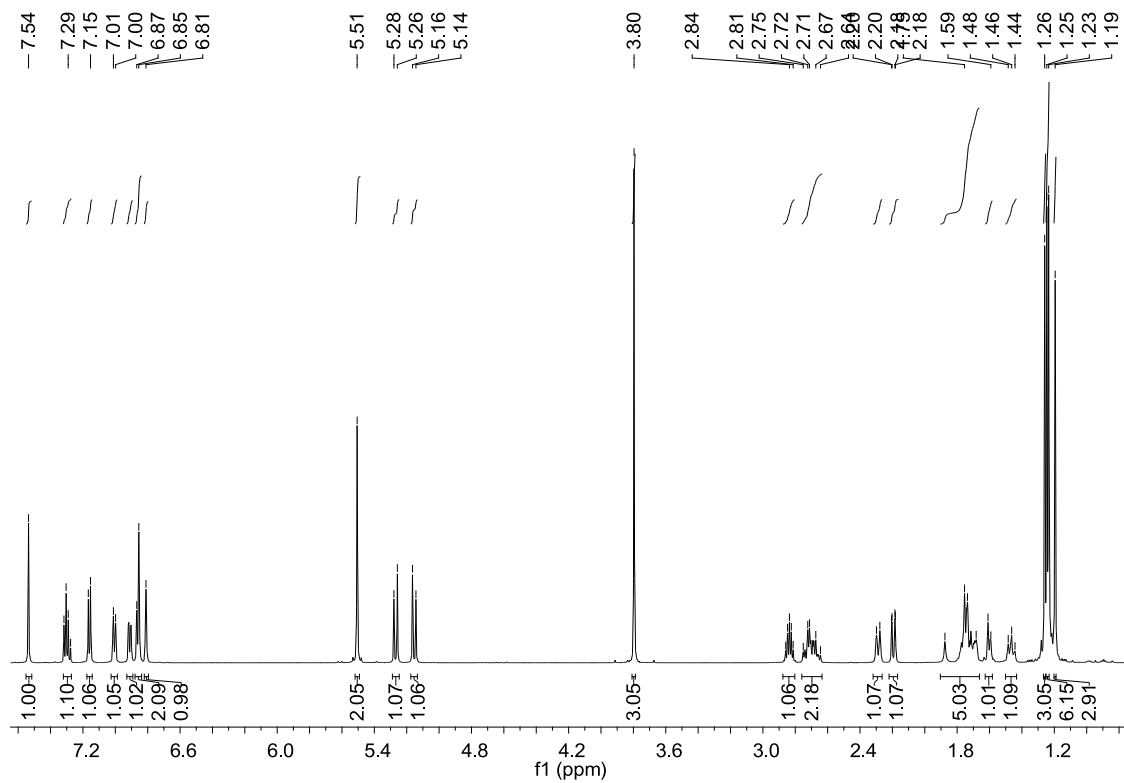

**Figure S47.  $^1\text{H-NMR}$  spectrum of 3p**

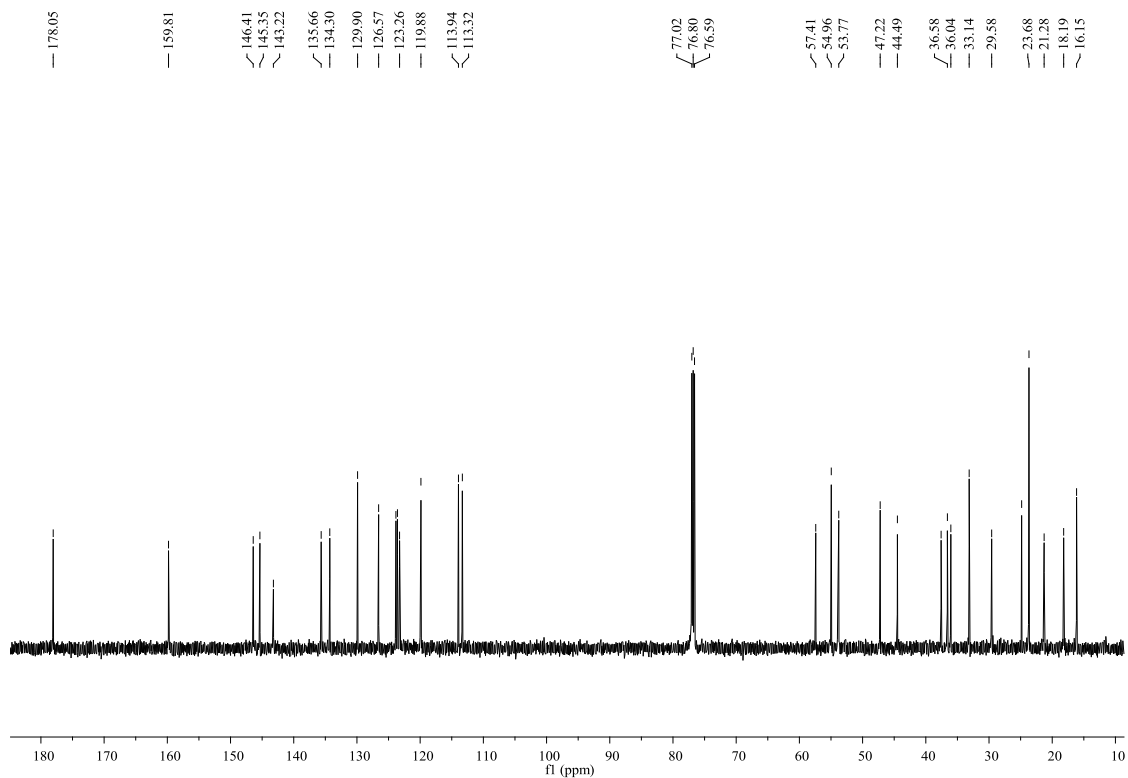

**Figure S48.  $^{13}\text{C-NMR}$  spectrum of 3p**
